# Sharp wave ripple coupling in zebrafish hippocampus and basolateral amygdala

Blanco, I.,<sup>1\*</sup> Caccavano, A.<sup>1#</sup>, Wu, J.<sup>1,2</sup>, Vicini, S.<sup>1,3</sup>, Glasgow, E.<sup>4</sup>, & Conant, K.<sup>1,2\*</sup>

<sup>1</sup>Interdisciplinary Program in Neuroscience, Georgetown University Medical Center, Washington, DC. <sup>#</sup>Currently at Section on Cellular and Synaptic Physiology, Eunice Kennedy-Shriver NICHD, NIH, Bethesda, MD. <sup>2</sup>Department of Neuroscience, <sup>3</sup>Department of Pharmacology and Physiology, <sup>4</sup>Department of Oncology, Georgetown University Medical Center, Washington, DC.

\*Correspondence: [ib379@georgetown.edu](mailto:ib379@georgetown.edu) and [kec84@georgetown.edu](mailto:kec84@georgetown.edu)

## ABSTRACT

The mammalian hippocampus exhibits sharp wave events (1-30 Hz) with an often-present superimposed fast ripple oscillation (120-200 Hz) forming a sharp wave ripple (SWR) complex. During slow wave sleep or consummatory behaviors, SWRs result from the sequential spiking of hippocampal cell assemblies initially activated during imagined or learned experiences. SWRs occur in tandem with cortical/subcortical assemblies critical to the long-term storage of specific memory types. Leveraging juvenile zebrafish, we show that SWR events in their hippocampal homologue, the anterodorsolateral lobe (ADL), in *ex vivo* whole-brains are locally generated and maintained. SWR events were also recorded in the basolateral amygdala (BLA). Concomitant single cell calcium imaging and local field potential (LFP) recordings showed that BLA SWs couple to ADL SWs. Calcium imaging recordings of whole-brains demonstrated that ADL and BLA SWRs are endogenously and spontaneously silenced by the activation of a more caudal population of putative cholinergic cells. Electrical stimulation of this caudal region silenced ADL SWs. Our results suggest that the SWR-generating circuit is evolutionarily conserved through shared acetylcholine modulating mechanisms. These findings further our understanding of neuronal population dynamics in the zebrafish brain and highlights their advantage for simultaneously recording SW/SWRs and single cell activity in diverse brain regions.

## INTRODUCTION

The mammalian hippocampus exhibits intrinsic spontaneous neuronal population oscillations known as sharp wave ripples (SWRs) during periods of awake immobility and slow wave sleep (Buzsáki et al., 1983; Buzsáki, 1986). SWRs are characterized by a relatively slow (1-30 Hz) strong deflection or sharp wave (SW), with an often-present superimposed fast ripple oscillation (150-250 Hz for rodents and 80-140 Hz for humans). SWRs are associated with the rapid and sequential replay of hippocampal place cell assemblies previously activated during learning experiences (Joo & Frank, 2018) and are necessary for the transfer of experiences to the neocortex for memory consolidation (Axmacher et al., 2006; Buzsáki et al., 1992; Buzsáki, 1986, 1996, 2015; Colgin, 2016; Ego-Stengel & Wilson, 2009; Fell et al., 2001; Girardeau et al., 2009, 2014; Jones et al., 2019; Mölle et al., 2006; Sadowski et al., 2016; Schlingloff et al., 2014; Skelin et al., 2021). Electrical or optogenetic disruption of SWRs is associated with impaired memory consolidation and recall (Ego-Stengel & Wilson, 2009; Girardeau et al., 2009). The basolateral amygdala (BLA), a subcortical brain region crucial for the processing, consolidation, and recall of emotional memories (McGaugh, 2004; O'Neill et al., 2018; Pignatelli & Beyeler, 2019), specifically associative and fear memories (Bocchio et al., 2017; Stork & Pape, 2002), also exhibits oscillatory neuronal patterns, including SWRs in mammals (Paré, 2002; Perumal et al., 2021; Ponomarenko et al., 2003; Popescu & Paré, 2011). Human studies have corroborated the translational relevance of using mammal animal models for recording and measuring SWRs events by showing mammalian SWR events' importance and occurrence during memory consolidation and recall (Feng et al., 2018; Norman et al., 2019; Vaz et al., 2020). Given the role of the hippocampus and amygdala in learning and memory consolidation, it can be postulated that the consolidation of hippocampal-dependent memories accompanied by emotional valence requires the

46 occurrence of time-locked SWR events between both areas. In fact, Cox *et al.*, 2020 showed that in  
47 humans, amygdala SWRs are temporally coupled with hippocampal SWRs during non-rapid eye movement  
48 (NREM) sleep.

49  
50 SWRs are modulated by neurotransmitters including GABA, glutamate, and acetylcholine (Buzsáki *et al.*,  
51 1983; Buzsáki, 1996, 2015; Schlingloff *et al.*, 2014; Sullivan *et al.*, 2011; Sun *et al.*, 2018; Ylinen *et al.*,  
52 1995; Y. Zhang *et al.*, 2021). SWR events are the result of the interplay between excitation and inhibition of  
53 neuronal subpopulations in the hippocampus (Buzsáki, 2015; Eller *et al.*, 2015; Schlingloff *et al.*, 2014;  
54 Sipilä *et al.*, 2006; Ylinen *et al.*, 1995). The same hippocampal circuitry that gives rise to SWR events during  
55 slow wave sleep and consummatory behaviors is necessary for the occurrence of theta/gamma burst (TGB)  
56 activity during exploration and memory encoding. Transition between the two states is modulated by  
57 acetylcholine levels. Exploration and memory encoding are associated with a high cholinergic tone and the  
58 sequential firing of place cells gives rise to TGB activity. TGB activity later transitions to SWR events, during  
59 which sequential re-activation of place cell assemblies occurs in an environment of low cholinergic tone  
60 (Buzsáki *et al.*, 1992; Buzsáki, 1996; Csicsvari & Dupret, 2014; Hasselmo, 1999; Herweg *et al.*, 2020; Ma *et*  
61 *al.*, 2020; Nyhus & Curran, 2010; O'Keefe, 1993; Osipova *et al.*, 2006; Sederberg *et al.*, 2006; Sullivan *et*  
62 *al.*, 2011; Wilson & McNaughton, 1994; Y. Zhang *et al.*, 2021). Studies with isolated murine hippocampal  
63 slices, which lack septal cholinergic input, have shown that increasing acetylcholine tone, exogenously, is  
64 accompanied by a decrease in the abundance of SWR events. Bath application of the muscarinic and  
65 nicotinic agonist, carbachol, abolishes SWR complexes and allows the transition to gamma and theta  
66 oscillations (Fisahn *et al.*, 1998; Fischer *et al.*, 2014, p.; Konopacki *et al.*, 1987; Li *et al.*, 2019; S. Zhang *et*  
67 *al.*, 2000). Alternatively, the cholinergic antagonist, atropine, reverses these changes and increases SWR  
68 abundance in mice (Fischer *et al.*, 2014; Hashimoto *et al.*, 2017). Furthermore, excessive cholinergic  
69 inhibition of hippocampal SWRs can impair memory (Buzsáki, 2015; Y. Zhang *et al.*, 2021).

70  
71 SWRs have been described in the anterodorsolateral lobe (ADL) – hippocampus homologue – in *ex vivo*  
72 whole-brain preparations from adult zebrafish (Vargas *et al.*, 2011, 2012). However, the neural substrates of  
73 juvenile zebrafish SWRs, including their spatial generation and maintenance, remain largely unknown. The  
74 homologue of the BLA can be found in the dorsal telencephalon of the zebrafish medially to the ADL.  
75 (Bartoszek *et al.*, 2021; Ganz *et al.*, 2015; Lal & Kawakami, 2022; Porter & Mueller, 2020; von Trotha *et al.*,  
76 2014). To date, it is still unknown whether the BLA of zebrafish exhibit SWRs and if the coupling between  
77 hippocampal and BLA SWRs is conserved to aid in hippocampal-dependent emotional memory  
78 consolidation in this animal model. It is also unclear whether the cholinergic system plays a role in  
79 modulating zebrafish SWR events as it does in mammals.

80  
81 In this study we recorded local field potentials (LFP) from both whole-brain and de-tectomized  
82 (telencephalon-only) *ex vivo* preparations from juvenile zebrafish to determine SWR electrophysiological  
83 properties, including their modulation by different neurotransmitters. We also took advantage of the everted  
84 zebrafish brain, in which both the ADL and BLA are in the most dorsal side of the telencephalon and used  
85 concomitant LFP and calcium imaging in whole-brain *ex vivo* preparations to look at SW coupling between  
86 these regions. We found that the zebrafish SWR-like activity is locally generated and maintained in the  
87 telencephalon though its abundance and duration seem to be further controlled by extra-telencephalic  
88 afferents. Like SWRs from murine hippocampal slices and adult zebrafish, juvenile zebrafish SWs are  
89 sensitive to AMPA and GABA<sub>A</sub> but not NMDA blockade (Behrens *et al.*, 2005; Maier *et al.*, 2003; Schlingloff  
90 *et al.*, 2014; Vargas *et al.*, 2012; Wu *et al.*, 2005). Consistent with previous literature, fluctuations in  
91 cholinergic tone modulated the abundance of SWs (Vandecasteele *et al.*, 2014; Y. Zhang *et al.*, 2021; Zhou  
92 *et al.*, 2019). The endogenous activation of a caudal region with putative cholinergic neurons spontaneously  
93 and transiently suppressed SWs and the electrical stimulation of this region corroborated the silencing of

94 these events. Our results suggest that the zebrafish hippocampal homologue can locally generate and  
95 maintain SWs and that these are in turn modulated by the cholinergic system. The data also show the  
96 coupling between ADL and BLA SW events. SWR coupling between these regions supports zebrafish as a  
97 model for studying emotional memory encoding and consolidation.  
98

## 99 **METHODS**

### 100 **Zebrafish Maintenance and Husbandry**

101 Groups of 10-20 wild-type and *Tg(elevl3:Hsa:H2B:GCaMP6s)jf5* juvenile (30-57 days old) zebrafish were  
102 housed in 2L tanks with water temperature kept at 28°C. Males and females were not separated for this  
103 study: they were treated as one homogenous population. Zebrafish were fed twice a day and kept on a  
104 14/10 light-dark cycle (lights on 9 AM and lights off at 11 PM). All procedures were performed in accordance  
105 with the Institutional Animal Care and Use Committee of Georgetown University, Washington DC, USA.

### 106 **Zebrafish Local Field Potential Recordings and Ca<sup>2+</sup> Imaging**

107 Zebrafish were submerged in an overdose of tricaine methanesulfonate (MS222, Sigma-Aldrich St. Louis,  
108 MO, USA) and whole-brains with the olfactory bulb intact, after decapitation and carefully removing the  
109 skull, were extracted. Brains were incubated in a chamber containing oxygenated (95% O<sub>2</sub>, 5% CO<sub>2</sub>)  
110 artificial cerebrospinal fluid (aCSF) previously described (Brenet et al., 2019), containing in mM: 134 NaCl,  
111 2.9 KCl, 2.1 CaCl<sub>2</sub>, 1.2 MgCl<sub>2</sub>, 10 HEPES, and 10 Glucose, pH 7.4 for at least 30 minutes at room  
112 temperature throughout the recovery period and recordings: 20 to 90 minutes. Recordings were obtained  
113 from the anterodorsolateral (ADL) lobe of the telencephalon of zebrafish, previously described (Vargas et  
114 al., 2012) to exhibit spontaneous events characterized as sharp wave (SW) with ripple embedded (SWR)  
115 similar to mammals. SWRs were also recorded from the BLA. For LFP recordings, electrodes from  
116 borosilicate glass pipettes were pulled using a Sutter P87 puller with 5 controlled pulls, resulting in an  
117 approximate 150 KΩ tip resistance and were filled with aCSF. The brains were constantly perfused inside a  
118 submerged recording chamber at a high flow rate (20 mL/min) at room temperature.

119 For concomitant LFP recordings and Ca<sup>2+</sup> imaging, *ex vivo* whole-brains from juvenile  
120 *Tg(elevl3:Hsa:H2B:GCaMP6s)jf5* zebrafish were kept in oxygenated aCSF at room temperature to recover  
121 for a minimum of 30 minutes. Brains were moved to an upright laser scanning confocal microscope system  
122 (Thor Imaging Systems Division) with constant perfusion and held down using a SHD-42/15 WI 64-1420  
123 Harp (Warner Instruments) for recording both LFP and single cell Ca<sup>2+</sup> transient activity in the  
124 telencephalon. We used the 488 nm laser (green) for Ca<sup>2+</sup> transient activity recordings and videos were  
125 captured using 512x512 pixel frames at a sample rate of 10 Hz. We used a 20x objective and an imaging  
126 field of 100-150 μm to ensure complete view of the telencephalon while retaining single cell resolution.

### 127 **Local Field Potential and Calcium Imaging Analysis**

128 Analysis of LFP recordings was performed using a custom MATLAB script previously described (Caccavano  
129 et al., 2020), with some modifications. After correcting for 60 Hz line noise and harmonics, a gaussian finite  
130 impulse response band-pass filter with corrected phase delay was applied between 1-1000 Hz and  
131 subsequently between the frequencies of interest including the SW (1-30 Hz) and ripple (120-220 Hz). The  
132 root mean square (RMS) of the SW and ripple was computed in sliding 30 and 5 ms windows, respectively.  
133 SW and ripple events were detected from the RMS signals that exceeded 6 and 4 standard deviations (SD)

134 above baseline, while the event start and end times were determined when the RMS signals exceeded 4  
135 and 3 SD above baseline, respectively. SWR events were defined as a subset of SW events with a  
136 concurrent ripple. For both SWs and ripples, events with a duration of less than 25 ms were discarded, and  
137 successive events with less than 150 ms inter-event interval were treated as one continuous event. To  
138 determine the baseline SD for each RMS signal in a way that accounts for both inactive and active  
139 recordings, the entire time series was binned into a histogram and a two-term gaussian fitting technique  
140 was employed to estimate both the baseline noise and true signal.

141 Calcium imaging data were first preprocessed with custom ImageJ (FIJI) macros previously described  
142 (Caccavano et al., 2020), before analysis in MATLAB. Raw image stacks were corrected for  
143 photobleaching, which was modeled as an exponential decay. Circular region-of-interests (ROIs) were  
144 manually placed around cell somas. For regional ROIs, neuronal clusters were chosen based on the pattern  
145 of activation before and during a silent period. The change in fluorescence over total fluorescence ( $\Delta F/F$ )  
146 was then computed as  $(F-F_0)/(F_0-F_b)$ , where  $F_0$  was defined as the average of the ten lowest intensities for  
147 each ROI, and  $F_b$  was defined as the lowest intensity pixel across the entire image and time series. These  
148 ROI time series were subsequently imported into MATLAB for coincidence detection with the LFP. Slow  
149 changes in the baseline fluorescence were corrected with a smoothed moving average spanning 25% the  
150 duration of the file.  $\Delta F/F$  signals were then interpolated to a 2 ms sampling rate, while the LFP was down-  
151 sampled to the same common sampling rate. Calcium transients were detected above 6 SD of each  $\Delta F/F$   
152 signal, with event start and end times determined when the  $\Delta F/F$  exceeded 4 SD. The baseline SD and  
153 event detection was carried out by the same algorithm as described for the SW and ripple detection.

## 154 **Pharmacological Agents**

155 Juvenile zebrafish *ex vivo* whole-brain preparations were exposed to pharmacological agents previously  
156 shown to modulate SW events in both mammals and adult zebrafish. AP-5 was used to block N-methyl-D-  
157 aspartate (NMDA) transmission and NBQX was used to block  $\alpha$ -amino-3-hydroxy-5-methylisoxazole-4-  
158 propionic acid (AMPA) transmission. Bicuculine Methiodide (BMI) was used to block GABA<sub>A</sub> receptors.  
159 Atropine, a muscarinic receptor antagonist, and Mecamylamine (MEC), a non-competitive nicotinic receptor  
160 antagonist, were used to block cholinergic transmission. All drugs were purchased from Sigma, St. Louis,  
161 MO, USA, and stock concentrations were dissolved in distilled water. LFP activity was recorded after final  
162 bath concentrations of 30  $\mu$ M AP-5, 5  $\mu$ M NBQX, 5  $\mu$ M NBQX + 25  $\mu$ M AP-5, 30  $\mu$ M Bicuculine, 10  $\mu$ M  
163 atropine, and 20  $\mu$ M MEC.

## 164 **Electrical Stimulation**

165 Region 4 (PMPa) was electrically stimulated (n = 3 whole-brain preparations) with a glass microelectrode  
166 with a tip opening of 10-50  $\mu$ m (~50 K $\Omega$ ). The stimulus pulse duration was 0.05 ms (generated by a Master  
167 8 stimulator), 100 pulses at 50 Hz were used. The stimulus intensity was 1-5  $\mu$ A.

## 168 **Statistical Analysis**

169 All statistical analyses were performed in GraphPad Prism 9.3. Data were tested for normality and  
170 lognormality via Shapiro-Wilk tests. Parametric Paired (Figure 2 & 5) and Unpaired Student's t tests  
171 (Figures 1) were performed. Parametric one-way ANOVA tests (Figure 7) with post-hoc Tukey's multiple  
172 comparisons corrections was performed after normality was accessed. Kolmogorov-Smirnov D test (Figure  
173 2) and Chi-Square (Figure 6) were also performed.



## 174 **Biorender license**

175 Cartoon images of the zebrafish brain were made with Biorender.com with *Agreement Number:*  
176 *PU24YGDOA2*.

## 177 **Code Accessibility**

178 All code is open-source and available in public repositories, including versions under development (Github)  
179 as well as archival copies used for this manuscript (Zenodo). MATLAB R2022a functions are available at  
180 <https://github.com/acaccavano/SWR-Analysis> (archival copy: DOI: 10.5281/zenodo.7490166). ImageJ (FIJI)  
181 macros are available at <https://github.com/acaccavano/deltaFoF> (archival copy: DOI:  
182 10.5281/zenodo.362513).

183

## 184 **RESULTS**

### 185 **SWR events in juvenile zebrafish are locally generated and maintained in the telencephalon**

186 We aimed to characterize the spatial generation, maintenance, and modulation of SW/SWR events in the  
187 ADL and BLA in the juvenile zebrafish which also enabled us to record calcium transients at single cell  
188 resolution in the entire telencephalon with a confocal microscope using a 20x lens. We previously showed  
189 that LFP recordings from the ADL region of the telencephalon of juvenile zebrafish display SW events with  
190 above background signal-to-noise ratio after 30 minutes of recovery in oxygenated aCSF at room  
191 temperature (Blanco & Conant, 2020). Building upon this observation, we applied dual LFP recordings from  
192 the ADL of both hemispheres in a whole-brain preparation and showed that both the left and right  
193 hemispheres have spontaneous time-locked LFP signal oscillations (Figure 1A-C). Given that in the  
194 mammalian hippocampus SWRs are locally generated and sustained in the absence of intact extra-  
195 hippocampal afferent connections (Buzsáki, 1986; Maier et al., 2003), we sought to better understand the  
196 spatial generation and maintenance of SWR events in the juvenile zebrafish brain. Therefore, we recorded  
197 LFP from whole-brains and de-tectomized (telencephalon only) preparations (Figure 1D). Like whole-brain  
198 recordings, de-tectomized brains exhibited SWR events composed of a SW (1-30 Hz) with an occasional  
199 embedded fast oscillatory ripple (120-220 Hz) (Figure 1E), suggesting their local generation within the  
200 zebrafish telencephalon. Quantification of these events (Figure 1F) reveals a significant increase in the rate  
201 of events per minute in de-tectomized preparations (mean = ~14) compared to whole-brain (mean = ~11)  
202 (Unpaired Student's t-test;  $t_{(33)} = 2.279$ ,  $p = 0.0293$ ; whole-brain  $n = 18$ ; de-tectomized  $n = 17$ ). A trend  
203 towards a decrease in the inter-event-interval (IEI) in de-tectomized brains was observed though it did not  
204 reach significance (Unpaired Student's t-test;  $t_{(31)} = 1.693$ ,  $p = 0.1004$ ; whole-brain  $n = 16$ ; de-tectomized  $n$   
205  $= 17$ ). The amplitude of these events was not changed (Unpaired Student's t-test;  $t_{(28)} = 0.9252$ ,  $p = 0.3628$ ;  
206 whole-brain  $n = 16$ ; de-tectomized  $n = 14$ ); however, removing the tectum and other extra-telencephalic  
207 areas significantly increased their duration (Unpaired Student's t-test;  $t_{(33)} = 3.507$ ,  $p = 0.0013$ ; whole-brain  $n$   
208  $= 18$ ; de-tectomized  $n = 17$ ). In our recordings we observed a decrease in the percent of SWR events  
209 compared to SW events given that some SW did not exhibit a ripple event (Figure 1G – left panel).  
210 Additionally, some SW events had an embedded doublet ripple (Figure 1G – right panel), previously shown  
211 to be associated with dendritic summation in rodents (Judák et al., 2022). As a result, we based further  
212 analysis on our quantitatively and qualitatively analysis on SW events alone. Together, the data show that  
213 SWR events are intrinsically generated and maintained within the telencephalon and that some of their  
214 properties are also regulated by extra-telencephalic afferents.

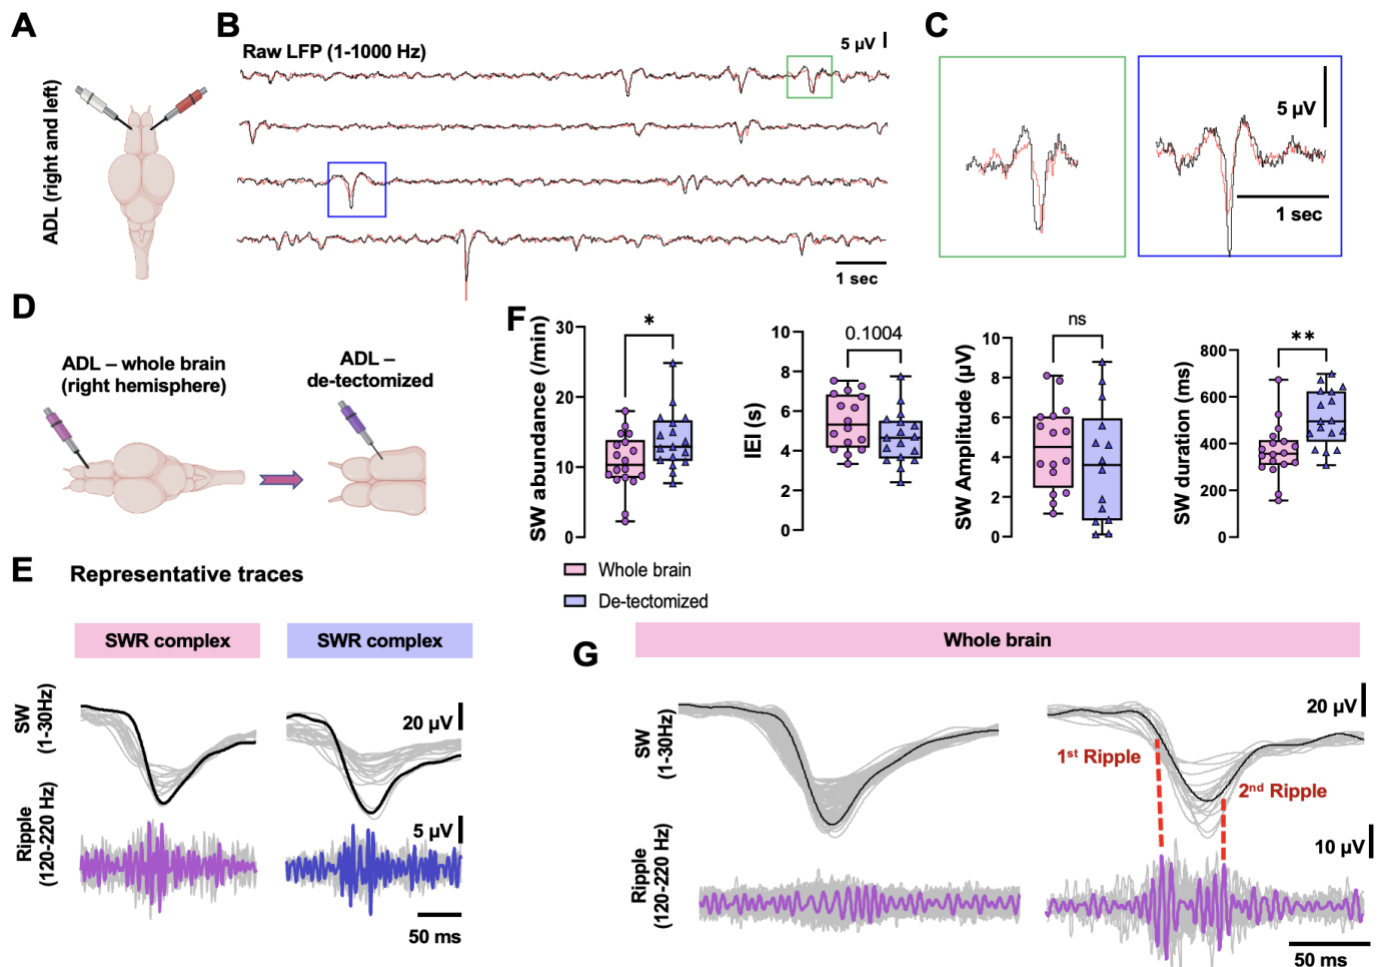

215  
216  
217  
218  
219  
220  
221  
222  
223  
224

**Figure 1. SWR events are locally generated and maintained within the telencephalon of juvenile zebrafish.** (a) Representative cartoon of the zebrafish brain and electrode placement in either the right or left ADL. (b) Representative superimposed LFP traces (1-1000 Hz) from the right ADL (white) and left ADL (red). (c) Zoomed in of individual LFP oscillation from (b). (d) Representative traces of electrode placement in the ADL of whole-brain preparations (left) and de-tectomized preparations (right). (e) Representative SWR complex from whole-brains (pink) and de-tectomized preparations (dark blue). (f) Quantification of SW events, IEI, amplitude, and duration between whole-brain and de-tectomized recordings. (g) Left panel: Representative SW event with no superimposed ripple. Right panel: Representative SW event with a ripple doublet. Data analyzed by Unpaired Student's t test. Box & whiskers plot. \* $p < 0.05$ , \*\* $p < 0.005$ .

225

## SWs in juvenile zebrafish are modulated by AMPA and GABA<sub>A</sub> but not NMDA signaling

226  
227  
228  
229  
230  
231  
232  
233  
234  
235  
236

To assess whether ADL-specific SW events are modulated by glutamate and GABA neurotransmission as previously described in mammals and whole-brain adult zebrafish (Behrens et al., 2005; Maier et al., 2003; Schlingloff et al., 2014; Vargas et al., 2012; Wu et al., 2005), we perfused whole-brain preparations with 30  $\mu$ M AP-5, an NMDA receptor antagonist; 25  $\mu$ M AP-5 + 5  $\mu$ M NBXQ, an AMPA and kainate receptor antagonist for glutamatergic signaling elimination; and 30  $\mu$ M bicuculline, a GABA<sub>A</sub> receptor antagonist. Constant bath perfusion (30 minutes) with 30  $\mu$ M AP-5 did not significantly affect the average abundance of SW events (paired t-test,  $t_{(7)} = 0.2984$ ,  $p = 0.7741$ ,  $n = 8$ ) (Figure 2A-C). Neither the amplitude nor the duration were significantly changed (paired t-tests,  $t_{(7)} = 0.4016$ ,  $p = 0.7000$ ;  $t_{(7)} = 0.8628$ ,  $p = 0.4168$ , respectively); however, the addition of 5  $\mu$ M NBQX to the bath solution in the presence of 25  $\mu$ M AP-5 significantly decreased SW events from an average of approximately 10 events per minute to 1 event per minute (paired t-test,  $t_{(3)} = 4.638$ ,  $p = 0.0189$ ,  $n = 4$ ) (Figure 2D-E). Although results were not significant,

237 exposure to NBQX/AP-5 showed a trend towards a decrease in both the amplitude (paired t-test;  $t_{(3)} =$   
 238 3.138,  $p = 0.0518$ ) and the duration (paired t-test;  $t_{(3)} = 2.391$ ,  $p = 0.0966$ ) of SW events.

239 Since locally generated spontaneous SW events are the result of the interplay between excitation and  
 240 inhibition (Buzsáki, 2015; Eller et al., 2015; Schlingloff et al., 2014; Sipilä et al., 2006; Ylinen et al., 1995),  
 241 we investigated whether the GABA<sub>A</sub> receptor antagonist bicuculline (30  $\mu$ M) affected SWs in whole-brain  
 242 juvenile zebrafish. After perfusion with bicuculline, there was a significant increase by approximately 50% in  
 243 the occurrence of spontaneous events (paired t-test;  $t_{(6)} = 2.643$ ,  $p = 0.0384$ ,  $n = 7$ ) (Figure 2G) with a  
 244 modified intermittent burst activity after filtering in the low-frequency band (1-30 Hz). This is similar to what  
 245 was previously observed in whole-brain adult zebrafish with a lower dose (10  $\mu$ M) (Vargas et al., 2012). This  
 246 modified pattern was composed of bursting events with varied amplitudes that, when averaged across all  
 247 recording events, showed no significant difference in amplitude between bicuculline-exposed and aCSF-  
 248 exposed brains (paired t-test,  $t_{(6)} = 0.2456$ ,  $p = 0.8142$ ) (Figure 2H inset). Plotting the cumulative distribution  
 249 for the amplitude (Figure 2H) (aCSF  $n = 2179$ , 30  $\mu$ M bicuculline  $n = 4052$ ) revealed a significant difference  
 250 between aCSF and bicuculline-perfused brains (Kolmogorov-Smirnov D test = 0.4713,  $p < 0.0001$ ). A 2-way  
 251 ANOVA showed that bicuculline significantly shifted the amplitude of SW events to the left (green arrow)  
 252 (Drug:  $F_{1, 14} = 0.08520$ ,  $p = 0.7746$ , Bin:  $F_{86, 1204} = 458.8$ ,  $p < 0.0001$ , Drug x Bin:  $F_{86, 1204} = 1.534$ ,  $p =$   
 253 0.0017).

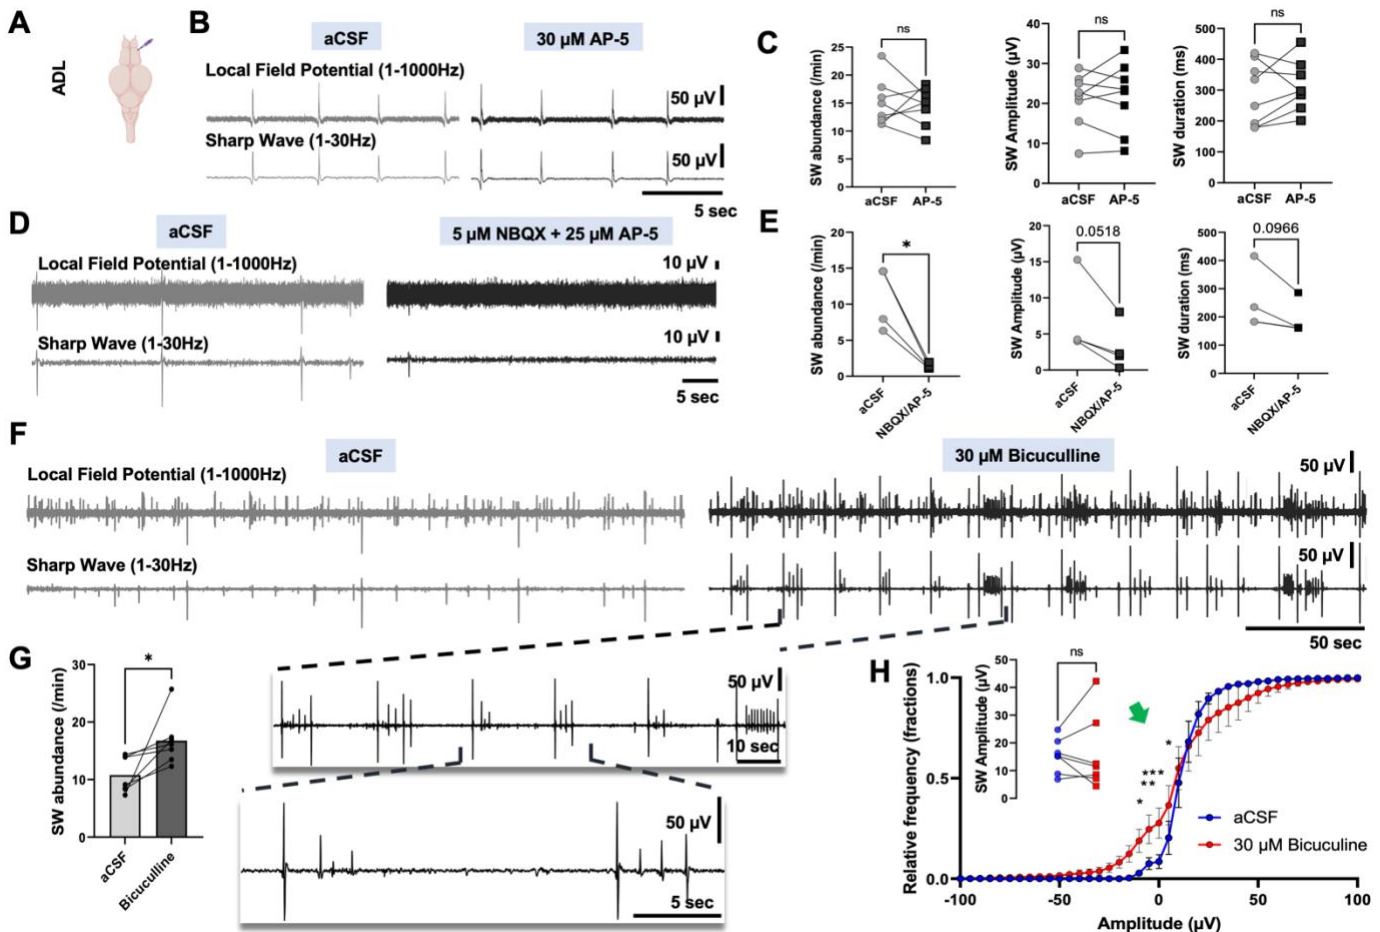

254 **Figure 2. SW events in the ADL are modulated by GABA<sub>A</sub> and AMPA but not by NMDA signaling.** (a)  
 255 Representative image of electrode placement for LFP recording from the ADL. (b-c) Exposure to 30  $\mu$ M AP-5 did not  
 256 change the abundance of SW events or duration. (d-e) 5  $\mu$ M NBQX + 25  $\mu$ M AP-5 significantly decrease the  
 257 abundance of SW events and trended towards a decrease in SW event amplitude and duration. (f-g) 30  $\mu$ M Bicuculline  
 258 significantly increased the average abundance of SW events. (h – inset) Average amplitude after bicuculline was not  
 259

260 changed. A significant change in the cumulative frequency was observed with a 2way ANOVA showing a shift to the  
261 left in the amplitude of SWs in the negative deflection (green arrow). \* $p < 0.05$ , \*\* $p < 0.005$ , \*\*\* $p < 0.0005$

## 262 **Ex vivo whole-brain preparations exhibit silent period events with no detectable LFP**

263 Sleep-like signatures have been previously shown in the zebrafish. Specifically, periodic slow bursting sleep  
264 alternates with propagating wave sleep, which is characterized by an overall reduction in neuronal activity.  
265 The latter follows a caudal-to-rostral activation of neurons located in the telencephalic midline in the dorsal  
266 pallium of sleep-deprived zebrafish (Leung et al., 2019). In our LFP recordings from the ADL of whole-brain  
267 *ex vivo* preparations, we also observed periods with no detectable LFP signal (no SW) ranging from 20 to  
268 over 150 seconds in duration, followed by a return of detectable LFP activity (Figure 3A). Most of these  
269 events occurred after a high amplitude SW event (purple arrow) with a pattern of subsequent activity that  
270 was variable. To understand the origin of silent periods in *ex vivo* whole-brain preparations, we  
271 simultaneously recorded LFP events and single cell calcium transient signals using the  
272 *Tg(elevl3:Hsa:H2B:GCaMP6s)* zebrafish line. Given the temporally coordinated firing of both telencephalic  
273 hemispheres (Figure 1A-C), most of our recordings and analyses were done in the right telencephalon  
274 (Figure 3B – top panel). We analyzed the calcium transients resulting from neuronal activity at the regional  
275 and single cell levels in two different planes of the zebrafish telencephalon (Figure 3B): the dorsal (D – pink)  
276 and the ventral (V – blue) side with a difference in depth of approximately 30-50  $\mu\text{m}$ . At each plane, we  
277 selected regions of interest (ROIs) based on the activation pattern during SWs events and silent periods  
278 observed under the confocal microscope (numbered and color-coded in Figure 3B). We further selected  
279 single cell ROIs within these clusters. We then determined the change in fluorescence over total  
280 fluorescence ( $\Delta F/F$ ) for each ROI as previously shown (Caccavano et al., 2020) with some modifications to  
281 accommodate the zebrafish data (see *methods*).

282 Alignment between ADL LFP events and calcium transients from selected ROIs (Figure 3 C1-C2) in the  
283 dorsal telencephalon showed spontaneous activity in region 1 (ADL) and region 2 (BLA) that were time-  
284 locked during the pre-silent period (Figure 3 C2). Strikingly, using single cell calcium transients, we  
285 observed that before a silent period event, the telencephalon underwent a massive activation possibly  
286 caused by depolarization (measured by the change in fluorescence – Figure 3 C2: Depolarization) in  
287 selected regions that was followed by a total elimination of LFP activity (Figure 3 C1-C2: Silent period).  
288 Single cell calcium transients (Figure 3 C3) were measured as  $\Delta F/F$  within demarked clustered regions and  
289 showed that regions previously not contributing to the generation and/or maintenance of SW events, such  
290 as region 4 (green) and 5 (blue) – most caudal ones, were involved in the silencing of SW events.

291 Ventrally, when we examined the pre-chosen clusters (like in the dorsal area), we observed that the total  
292 fluorescence activity increased matching that of LFP recordings in ADL and BLA (Figure 3 D1-D3). A similar  
293 pattern was shown for the silencing of SW events with neuronal activation going from a caudal to rostral  
294 direction (Figure 3 D1-D3). However, we did not see significant changes in calcium transient signals at the  
295 single cell level in these ventral areas. This could be the result of the difference in depth of the tissue. The  
296 massive activation that culminates in the elimination of SW events in our preparations (dorsal and ventral)  
297 typically resulted from a stereotypical pattern of neuronal activity starting at the caudal region of the  
298 telencephalon (region 4) and propagating rostrally (Figure 3E). This type of caudal-to-rostral propagation  
299 often involved the activation of the telencephalic midline (Supplemental video 2). Though a more detailed  
300 analysis including neuronal tracing is needed to better decipher the propagation of caudal-rostral neuronal  
301 activity recruitment leading to silent periods, here we propose a working model for the silencing of SW  
302 events in the dorsal side of the telencephalon (Figure 3F). We posit that region 4, previously shown through  
303 immunohistochemistry to house cholinergic neurons (Clemente et al., 2004), receives input from other



304 areas of the brain which consequently increases the cholinergic tone in the telencephalon and leads to a  
 305 silencing of SW events in both the ADL and the BLA. We further propose that this caudal region of putative  
 306 cholinergic neurons may project to both the ADL and BLA via collaterals. Though region #3 is demarcated  
 307 as an isolated region, it may be part of the amygdaloid complex (Porter & Mueller, 2020) and can explain  
 308 the single cell activity observed in this region (Figure 3 C3 purple).

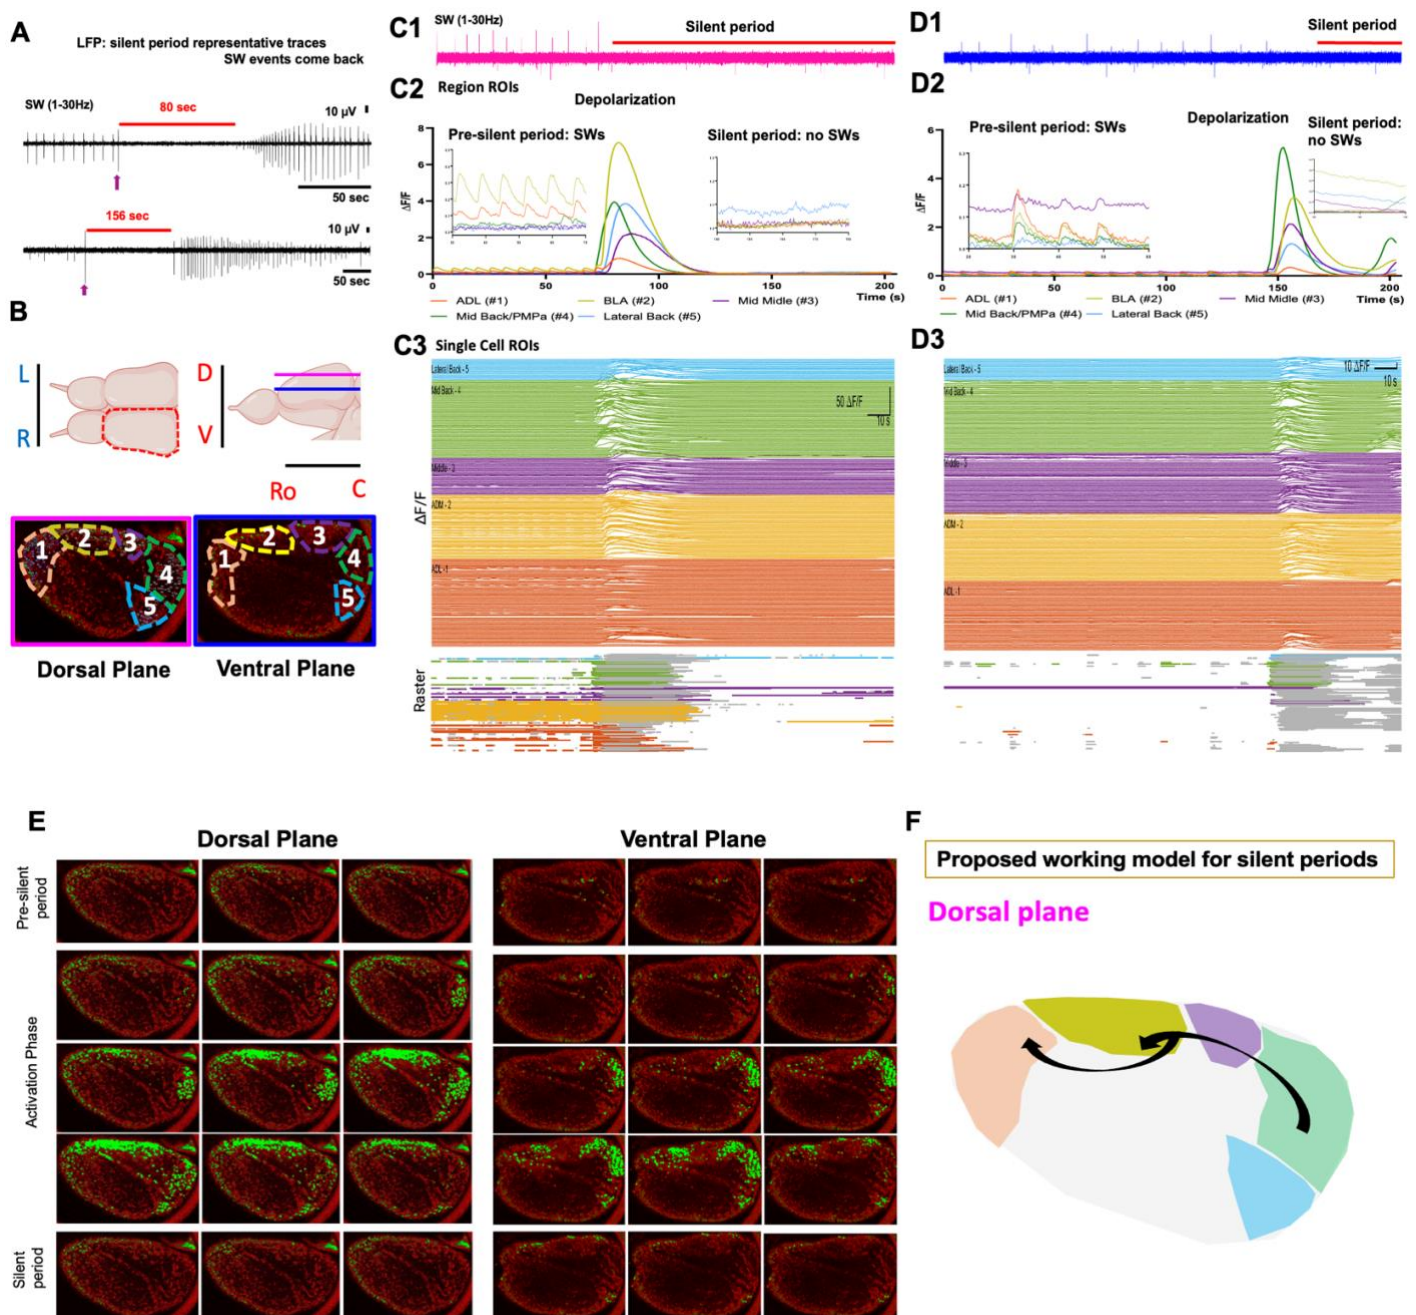

309 **Figure 3. Dual LFP and calcium transient recordings reveal silent period events in the zebrafish brain**  
 310 **following massive caudal-rostral neuronal activation.** (a) Representative SW traces from juvenile zebrafish with  
 311 silent events lasting from 80 to 156 seconds. Returning SW events have distinct amplitude patterns: increase,  
 312 decrease, and no change. Purple arrow shows a high amplitude event that often happens before a silent period. (b)  
 313 *Top*: A dorsal view drawing of a zebrafish brain showing the olfactory bulb and the telencephalon with the right  
 314 telencephalon bordered by a red dashed line, and a lateral view drawing showing the olfactory bulb and the  
 315 telencephalon with the approximate levels of the dorsal (pink) and ventral (blue) planes indicated with lines. Directional  
 316 axes are indicated as left (L) vs right (R.), dorsal (D) vs ventral (V), and rostral (Ro) vs caudal (C). *Bottom*: Images of

317 the left telencephalon of *Tg(elevl3:Hsa.H2B:GCaMP6s)* juvenile zebrafish under the confocal microscope with the pink  
318 bordered image corresponding to the dorsal plane and the blue bordered image to the ventral plane (about 30-50  
319 microns apart), the medial side is facing up and the lateral side is facing down. Images are divided into five different  
320 regions of interest based on the neuronal firing associated with both the generation of SW and the massive activation  
321 preceding silent periods. (c1-d3) The same analysis and similar neuronal firing were done for the dorsal area of the  
322 telencephalon (pink) and the ventral (blue) area with regards to silent period generation. Dual recordings of neuronal  
323 population recordings (c1, d1) and regional/single cell calcium imaging (c2, d2, c3, d3) in the  
324 *Tg(elevl3:Hsa.H2B:GCaMP6s)* were aligned showing temporally coordinated firing between the ADL (region 1) and  
325 BLA (region 2) during SW events while regions 4 and 5 were silent. (c2, d2) Massive increase in the  $\Delta F/F$  in all regions  
326 starting in region 4 in the dorsal and ventral regions of the telencephalon. (c2, d2 insets) Zoomed in graphs before and  
327 after the silent period. (e) Example timelapse images of the right hemisphere from the dorsal and ventral planes of a  
328 *Tg(elevl3:Hsa.H2B:GCaMP6s)* transgenic brain exhibiting SW events and a silent period – calcium transients are  
329 shown in green. During the *Pre-silent period*: regions 1 and 2 show SW events and changes in  $\Delta F/F$ . During the  
330 *Activation* phase, there are no detectable SW events but a massive activation that starts in region 4 and propagates  
331 rostrally. No single cell activity during the *Silent period* phase. (f) A proposed model of caudal-to-rostral inhibition of  
332 SW events (n = 3).

### 333 **SW event coupling between ALD and BLA in *ex vivo* juvenile zebrafish brains**

334 Previous studies in murine and humans have shown the occurrence of SWR events in the BLA and their  
335 coupling to SWR events in the hippocampus (Cox et al., 2020; Paré, 2002; Perumal et al., 2021;  
336 Ponomarenko et al., 2003; Popescu & Paré, 2011). Given that the BLA of juvenile zebrafish showed  
337 calcium transient neuronal activity that was time-locked to the activity in the ADL (Figure 3 and  
338 Supplemental video 1), we next asked if the zebrafish BLA had detectable LFP activity and consequently  
339 SW/SWR events. We performed dual LFP recordings from the ADL and BLA (Figure 4A-C) and showed  
340 that the zebrafish BLA exhibits LFP activity and that this activity is coupled to ADL LFP activity. We further  
341 demonstrated that spontaneously occurring LFP activity in the BLA exhibited events composed of a SW  
342 event (1-30 Hz) with a superimposed ripple oscillation (120-220 Hz) (Figure 4D).

343 We then aligned single cell calcium transient recordings from the ADL (Figure 4E) and the BLA (Figure 4F),  
344 to LFP recorded specifically from the ADL to further show time-locked activity between single cells in both  
345 regions to ADL LFP recordings (Figure 4E-F). The alignment revealed that not all neurons in the ADL or  
346 BLA contribute to a SW event as measured by LFP in the ADL. This is a key similarity between murine  
347 hippocampal slices in which only up to 50% of pyramidal neurons contribute to a single SWR event  
348 (Ellender et al., 2010; Evangelista et al., 2020; Hajos et al., 2013, p.; Ylinen et al., 1995). Merging of single  
349 cell recordings from both brain regions (Figure 4G) corroborates the coupling between neuronal firing in  
350 these areas and the generation of a SW event (pink shaded areas in G are examples of coupling). Though  
351 not all SW events have an embedded ripple, the high temporal coordination in the LFP activity between the  
352 ADL and BLA will result in the coupling of SWR events in these two brain regions similar to that in  
353 mammals.

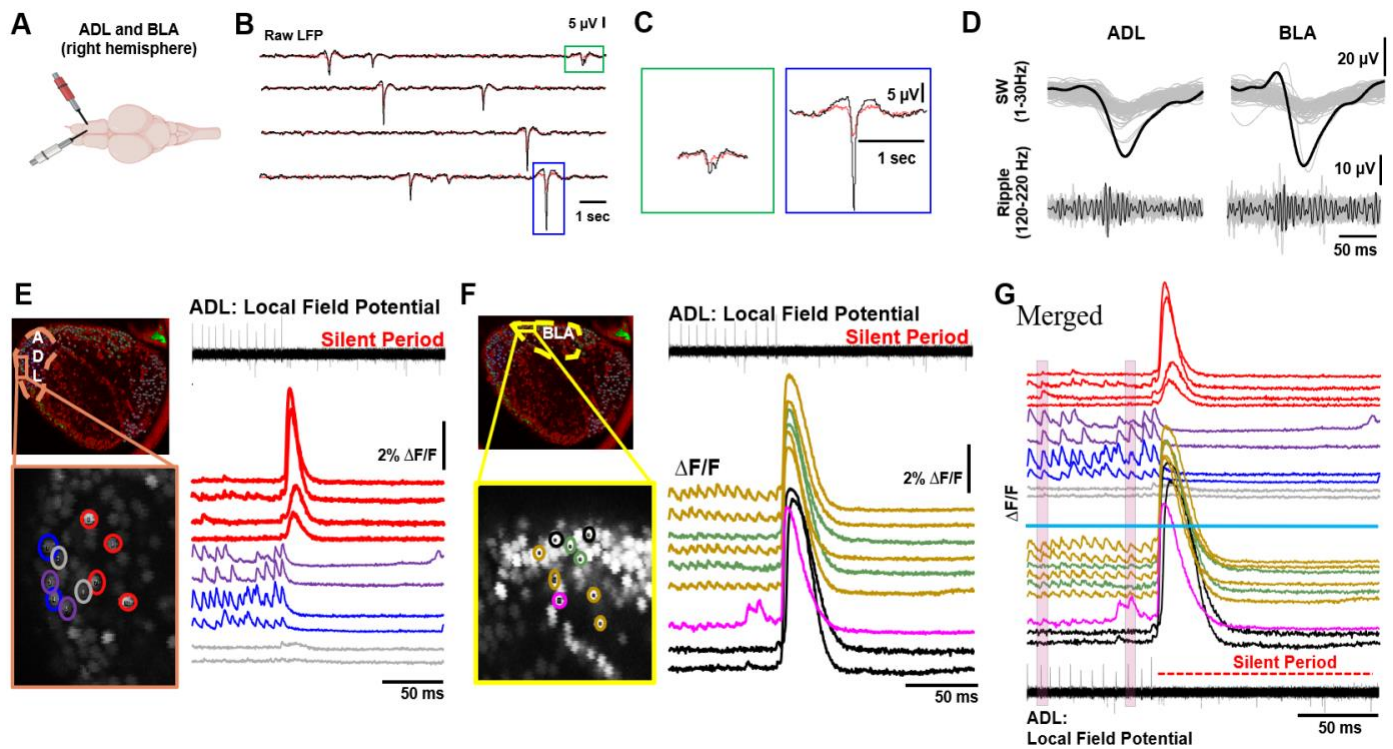

354

355

356

357

358

359

360

361

362

363

**Figure 4. BLA exhibits LFP activity that is coupled to ADL SWR activity. Single cell neuronal activity contributing to SW events is variable.** (a) Representative image of electrode placement in both the ADL (red) and BLA (white). (b) Representative superimposed LFP traces (1-1000 Hz) between ADL (red trace) and BLA (blue trace). (c) Zoomed in individual LFP oscillation from (b). (D=d) Representative SWR complex from the ADL and the BLA. (e & f) Representative image of the telencephalon of a *Tg(elev13:Hsa.H2B:GCaMP6s)* juvenile zebrafish with the ADL (e) or BLA (f) labeled and zoomed in to show ROIs for single cells, along with alignment of single cell activity (color matched) to LFP from the ADL. (g) Merged single cell activity, separating the ADL (top) from the BLA (bottom) by the solid blue line, aligned to ADL LFP. Examples of coupling between neuronal firing in these areas and LFP activity are shown in the pink shaded areas.

364

### Stimulation of region 4, containing putative cholinergic neurons, suppresses SW events

365

366

367

368

369

370

371

372

373

374

375

376

377

Our data suggested (Figures 3 and 4) that silent periods preceded a massive activation of neurons in the telencephalon starting in region #4, which contains putative acetylcholinesterase positive neurons (Clemente et al., 2004). This region is known as the posteromedial pallial amygdala (PMPa) (Porter & Mueller, 2020), and is functionally connected to the BLA (Northcutt, 2008; von Trotha et al., 2014), perhaps explaining some single cell activation in this area during SW events. To corroborate the involvement of the PMPa in silencing SW events in the ADL, we stimulated this region and recorded LFP activity in the ADL (Figure 5A-B). A single stimulation suppressed SW event abundance (paired t-tests,  $t_{(2)} = 4.507$ ,  $p = 0.0459$ ,  $n = 3$ ) and decreased their amplitude ( $t_{(2)} = 1.254$ ,  $p = 0.3366$ ,  $n = 3$ ) despite the later not reaching significance (Figure 5D). In the ADL, the suppression time of SW events was variable (blue shaded areas) with returning events (Figure 5C). Interestingly, we observed that a second stimulation after LFP activity returned to baseline, increased the duration of the suppression, and decreased the amplitude of events compared to the first stimulation. We furthered observed that stimulation of PMPa induced suppression of LFP that was longer than endogenous silent period events (red shaded area).



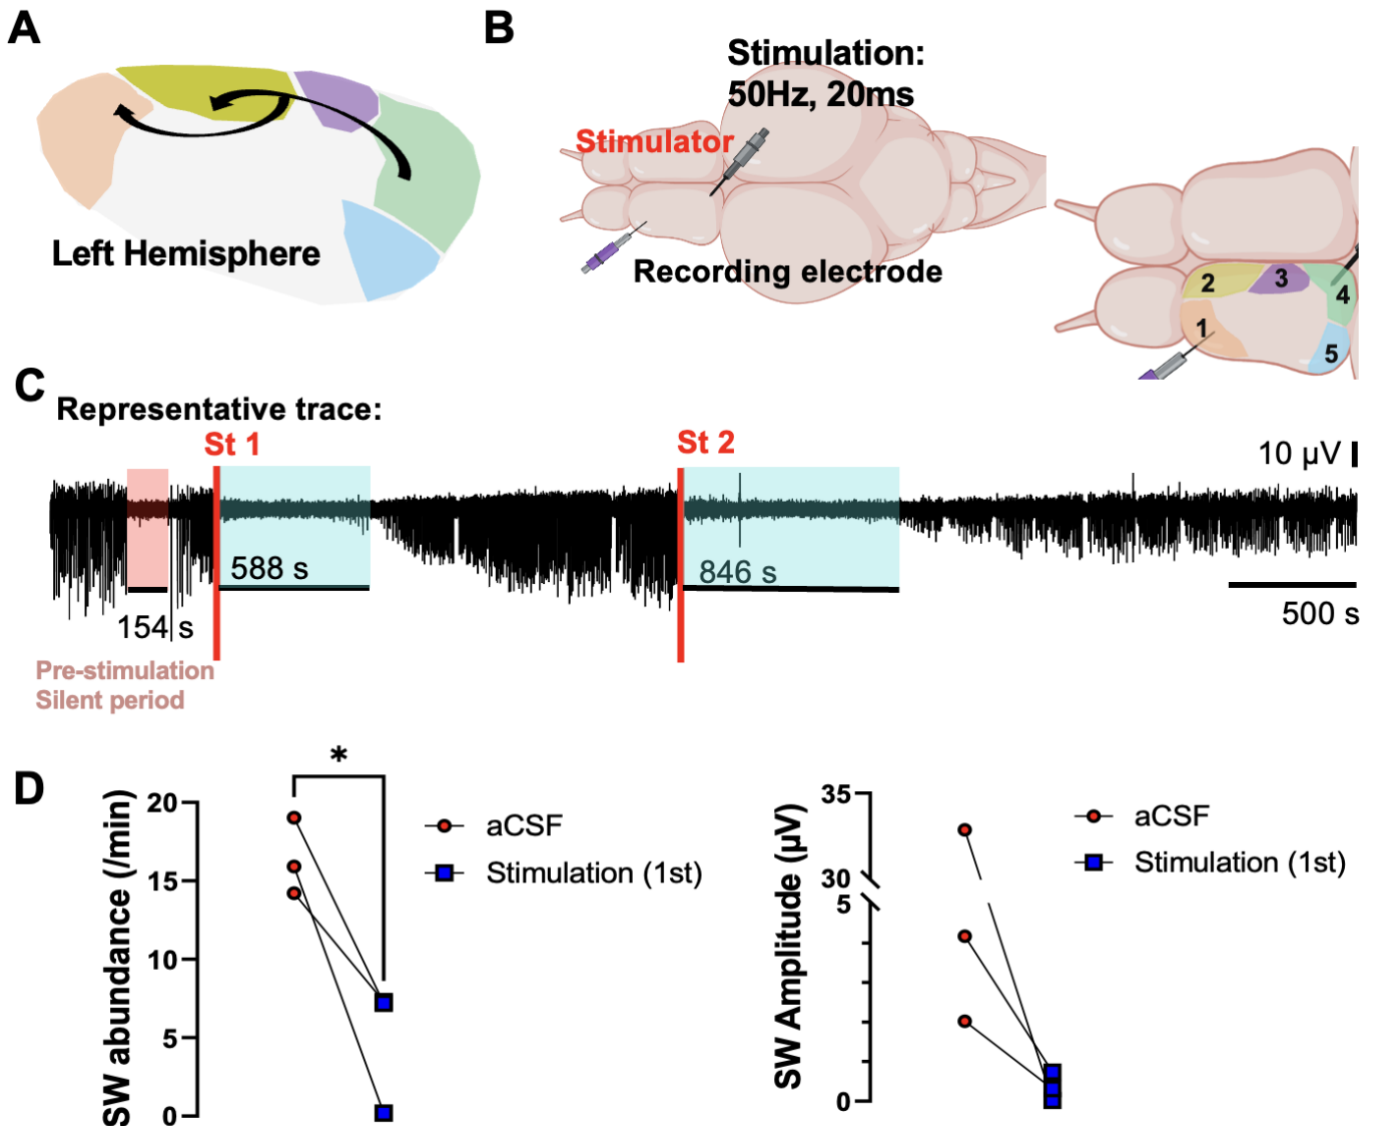

378  
379

380

381

382

383

384

385

**Figure 5. Caudal telencephalic stimulation of putative cholinergic neurons suppresses ADL SW events.** (a) Proposed model for the generation of silent periods with activation of region 4 – putative cholinergic neurons. (b) Representative brain showing the placement of the stimulating electrode (region 4) and recording electrode (ADL – region 1). (c) Representative LFP trace showing the start of the stimulation and the resulting suppression of LFP activity (shaded blue area). After suppression the activity comes back and is further suppressed by a second stimulation. Of note: the trace had a silent period before stimulation. (d) Shows the quantification of both SW abundance and the SW amplitude both of which were decreased within the first 10 minutes after the first stimulation.

386

### Muscarinic receptor antagonism decreases silent periods

387

388

389

390

391

392

393

394

395

We investigated the involvement of the cholinergic system in modulating silent periods and SW events by recording LFP from whole-brains treated with atropine (10  $\mu$ M), and Mecamylamine (MEC – 20  $\mu$ M). In the zebrafish, most cholinergic nuclei are located in the diencephalon, mesencephalon and rhombencephalon (Clemente et al., 2004; Toledo-Ibarra et al., 2013). We then reasoned that whole-brain preparations with an intact cholinergic system would exhibit more silent periods than recordings from de-tectomized preparations with a compromised cholinergic system. Silent periods were observed in all recordings (whole-brain in aCSF (n = 18), de-tectomized preparations (n = 17), whole-brains + atropine (n = 10), and whole-brains + MEC (n = 12)) (Figure 6A); however, compared to whole-brain (77% of brains had at least one silent period), de-tectomized preparations had a 2X reduction in the number of recordings exhibiting at least one



396 silent period (Figure 6B). Atropine significantly decreased the number of silent periods within a whole-brain  
 397 preparation when compared to controls (40% reduction) but was not significantly different from de-  
 398 tectomized brain preparations. However, MEC did not decrease the number of brains exhibiting a silent  
 399 period compared to whole-brain recordings. Together, the data show that muscarinic receptors and extra-  
 400 telencephalic afferents are involved in the modulation of silent periods, and additionally, these findings  
 401 suggest that silent periods are locally regulated.

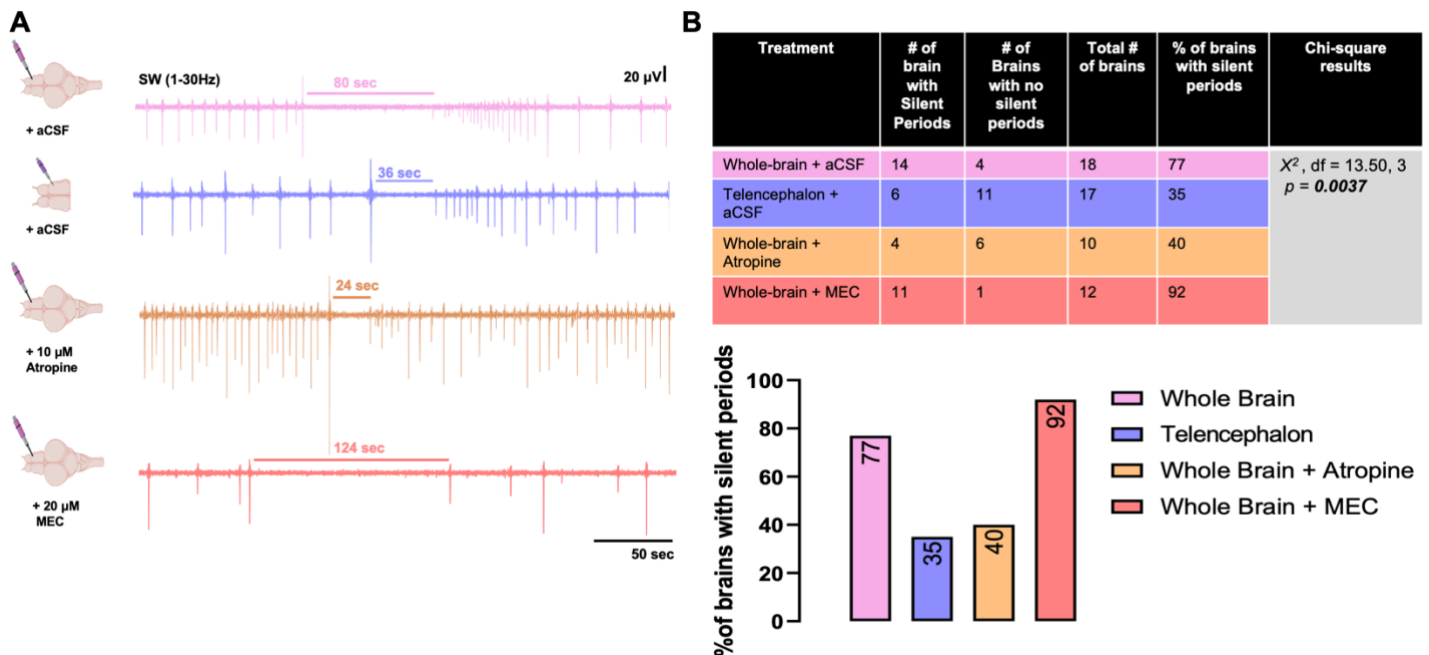

402 **Figure 6. Silent periods are modulated by muscarinic receptors and can be generated intrinsically in the**  
 403 **telencephalon.** (a) Representative filtered SW events containing silent periods for whole-brain in aCSF, telencephalon  
 404 only in aCSF, whole-brain + 10 μM atropine, and whole-brain + 20 μM MEC. (b) Quantification of the number of brains  
 405 containing at least one silent period per recording and bar graph showing the corresponding percent change. Chi-  
 406 square ( $X^2$ ) = 13.50, df = 3,  $p = 0.0037$ .  
 407

#### 408 Muscarinic receptor antagonist and agonists differentially modulate SW events

409 Rodent studies show that blocking muscarinic receptors significantly increases SWR events while  
 410 enhancing muscarinic activity abolishes SWR events (Y. Zhang et al., 2021). These findings coupled with  
 411 our result that atropine, a muscarinic antagonist, decreases the number of brains with at least one silent  
 412 period led us to hypothesize that the introduction of atropine would increase the number of SW events  
 413 compared to whole-brains. Indeed, we found that atropine increased the number of SW events per minute  
 414 (aCSF mean = 8.79) approximately two-fold when compared to whole-brains in aCSF (atropine mean =  
 415 18.78) ( $F_{(2,37)} = 9.123$ ,  $p = 0.0006$  one-way ANOVA with Tukey's multiple comparisons test:  $p = 0.0004$ )  
 416 (Figure 7A). Using the non-competitive nicotinic antagonist MEC, however, did not significantly change the  
 417 abundance of SW events (mean = 11.96) when compared to whole-brains in aCSF ( $p = 0.4435$ ). A shift to  
 418 the left was observed in the IEI cumulative frequencies from whole-brains treated with both atropine and  
 419 MEC (single events were pulled from recordings in (Figure 7A), whole-brain in aCSF  $n = 9293$ , whole-brain  
 420 + atropine  $n = 13\ 400$ , whole-brain + MEC  $n = 9008$ ) with a significant average decrease only in brains  
 421 treated with atropine (Figure 7B – inset) ( $F_{(2,32)} = 4.121$ ,  $p = 0.0256$  one-way ANOVA with Tukey's multiple  
 422 comparisons test) ( $p = 0.0213$ ). Interestingly, individual IEI histograms revealed an IEI bi-modal distribution  
 423 that was abolished with both atropine and MEC (Figure 7C-E).

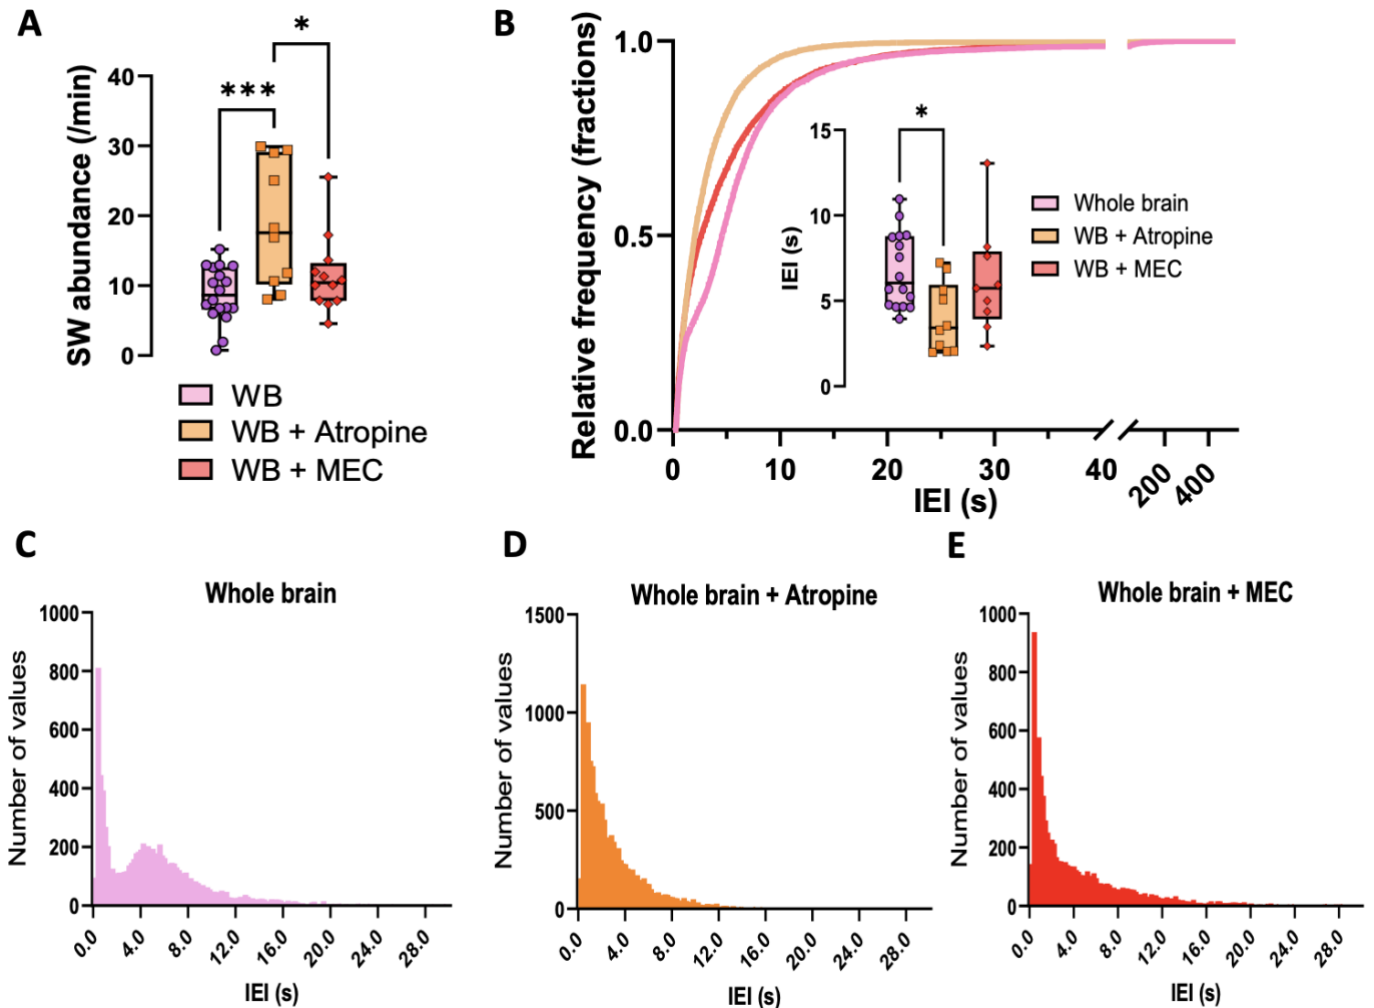

424  
425  
426  
427  
428  
429

**Figure 7. SW events are modulated by the cholinergic system.** (a) 30 minutes exposure to 10  $\mu$ M atropine significantly increased the number of SW events compared to whole-brains in aCSF, whereas exposure to 20  $\mu$ M MEC did not. (b) Both atropine and MEC shifted the IEI cumulative frequency to the left with atropine showing a significant decrease in the average IEI compared to whole-brain in aCSF. (c-e) Histogram frequencies of IEI with 0.2 bin size and same n as in (b).

430

## 431 DISCUSSION

432 In the present study we show that SWR events recorded from the ADL are intrinsic to the telencephalon,  
433 though their abundance and duration can be controlled by extra-telencephalic afferents. Additionally, SWR  
434 events occur in the BLA and concomitant single cell calcium imaging and LFP recordings demonstrated that  
435 SW events in the ADL are coupled to BLA SW events. Moreover, calcium imaging of whole-brains  
436 demonstrated that SWs in both the ADL and BLA are endogenously and spontaneously silenced (silent  
437 periods) by the activation of a more caudal population of putative cholinergic cells, region 4 – PMPa.  
438 Electrical activation of this region silenced SW events in the ADL. Exposure to atropine decreased the  
439 number of brains with at least one silent period and increased the abundance of SW events in the ADL.  
440 These data contribute to our understanding of neuronal population dynamics in the zebrafish brain and  
441 highlight its advantage for the simultaneous recording of SWs and single cell activity in different brain

442 regions important for learning and memory consolidation. The data also suggest a remarkable conservation  
443 of regional SW coupling and cholinergic modulation from mammals to teleost.

#### 444 **Intrinsically generated SWRs in the ADL:**

445 Previously, (Vargas et al., 2012) established the occurrence of SWR events in the ADL – hippocampus  
446 homologue – of whole-brain adult zebrafish showing that they had similar features to mammalian SWR  
447 events. In the present study we show these events in whole-brain juvenile zebrafish, similar to that of  
448 rodents and adult zebrafish (Behrens et al., 2005; Maier et al., 2003; Schlingloff et al., 2014; Vargas et al.,  
449 2012; Wu et al., 2005), are modulated by AMPA and GABA<sub>A</sub>, but not NMDA signaling (Figure 2). We  
450 corroborated the induction of intermittent burst of spontaneous activity after perfusion with a high dose of  
451 bicuculline (30  $\mu$ M) previously reported in adult zebrafish and murine preparations (Kim et al., 2004; Ogawa  
452 et al., 1991; Vargas et al., 2012). A finding of the present study is the time-locked occurrence of SW events  
453 between hemispheres and their intrinsic generation and maintenance in the telencephalon (Figure 1).  
454 Interestingly, recordings from sleeping Sprague-Dawley rats have previously shown asynchrony between  
455 SWR events from the left and right hippocampus due to the lateralization of spatial memories (Villalobos et  
456 al., 2017). Thus, future studies may be warranted to determine whether zebrafish ADL SW events are  
457 hemispherically uncoupled in select behavioral states. It is important to note that other zebrafish brain  
458 regions such as the habenula do show effects of laterality.

459 Though zebrafish have approximately seven-fold fewer neurons than rodents, as in murine hippocampal  
460 slices, we observed that not all neurons in the SW-generating vicinity participate in the genesis and  
461 maintenance of a SW event (Figure 4E). Additionally, the activation of neurons during a single SW event  
462 does not seem dependent on their direct proximity to each other as neighbor neurons in the ADL behaved  
463 differently during a SW event (Figure 4E – grey versus blue or blue and purple). We can speculate that the  
464 differential activation of these neurons may resemble the re-activation of neuronal ensembles where not all  
465 cells within an area form part of the encoded memory. It has been previously shown that neighbor neurons  
466 that participate in a given ensemble do not need to be in direct contact with one another (Minatohara et al.,  
467 2016; Wagatsuma et al., 2018).

468 SW events recorded from the ADL of de-tectomized preparations showed an increase in their abundance  
469 and duration (Figure 1F). One explanation for the increase in SW events in the recordings of de-tectomized  
470 preparations is an overall decrease in the number of preparations containing a silent period (Figure 6). This  
471 pattern is also observed in whole-brains exposed to atropine (discussed in more detail later), which hints at  
472 the modulation of SW events by extra-telencephalic afferents. For instance, it is widely accepted that SWR  
473 events in mammals are modulated by different subcortical areas including the septum (Nicoll, 1985) and  
474 hypothalamus (Vicente et al., 2020). However, the dialogue between the hippocampus and other cortical  
475 areas, including the somatosensory cortex during specific types of memory formation (Tukker et al., 2020),  
476 cannot be discounted as a potential modulator of SW events in the zebrafish brain.

477 Future research should investigate the involvement of the zebrafish habenula in controlling silent periods  
478 and the abundance and duration of SWs. In the zebrafish, the habenula is located between the  
479 telencephalon and the tectum and can be damaged in de-tectomized brains. In the fish, the habenula is  
480 additionally shown to house choline acetyltransferase positive neurons (Cheng et al., 2014) which play a  
481 critical role in modulating SW events. In rodents, the activity of the habenula has been shown to be phase-  
482 locked to theta oscillations in the hippocampus and its silencing modulates hippocampal-dependent spatial  
483 recognition tasks (Görllich et al., 2013; Goutagny et al., 2013). This study suggested functional connectivity  
484 between the hippocampus and the habenula, specifically the same circuit that gives rise to SW events. The

485 habenula also exerts inhibitory control over brain areas associated with the dopaminergic system  
486 (Lecourtier et al., 2008). Indeed, the dopaminergic system, which adds saliency to memories, has been  
487 shown to enhance SW events during immobility in rodents (Ambrose et al., 2016; Fuchsberger & Paulsen,  
488 2022; Loren, 2009).

#### 489 **SW/SWR events in the BLA and their coupling to ADL SW/SWR events:**

490 In mammals, diverse cortical/subcortical regions also exhibit synchronous neuronal oscillations, including  
491 sleep spindles during stage 2 sleep or SWR events during slow wave sleep, that are coupled to  
492 hippocampal SWR events and important to consolidation of different memory types (Eller et al., 2015; Fell  
493 et al., 2001; Fries, 2005; Ji & Wilson, 2007; Perumal et al., 2021; Skelin et al., 2019, 2021; Vaz et al., 2020;  
494 Wilber et al., 2017). Specifically, in human studies, the BLA has been shown to exhibit SWR events  
495 (Perumal et al., 2021) that are coupled to hippocampal SWRs for the consolidation of hippocampal-  
496 dependent memories with emotional valence (Cox et al., 2020). In the present study, we present evidence  
497 for the generation of SWR events in the BLA of juvenile zebrafish. As in the ADL, a subset of SW events  
498 exhibits a superimposed ripple (120-220 Hz) (Figure 1E) and not all neurons contribute to the SW event  
499 (Figure 4F). An additional novel finding is the temporal coupling between ADL and BLA SW events as  
500 detected by simultaneous LFP and calcium imaging recordings (Figure 4). This supports the possibility that  
501 these two structures work in tandem to facilitate the consolidation of emotional memories in zebrafish as  
502 they do in mammals through the coupling of SWR events.

503 In rodents an enriched environment enhances SWR amplitude in subsequently prepared *ex vivo*  
504 hippocampal slices (Landeck et al., 2021), and in humans learning just prior to sleep increases slow wave  
505 sleep-associated SWR abundance (Eschenko et al., 2008). Aversive learning associated coupling of  
506 hippocampal and amygdala activity in rodents is also observed in subsequent slow wave sleep (Girardeau  
507 et al., 2017). Thus, it would be of interest to determine whether an experience with emotional valence, such  
508 as novelty or fear learning, would increase the abundance of SWRs occurring simultaneously in the ADL  
509 and BLA in future studies. The zebrafish model, which facilitates combined electrophysiological recordings  
510 and simultaneous visualization of calcium responses in diverse brain regions, would lend itself well to the  
511 study of varied types of memory consolidation during physiological and pathological states.

#### 512 **Cholinergic modulation of SW events and silent periods:**

513 The occurrence of SWR events is modulated by cholinergic tone with high cholinergic tone inhibiting SWR  
514 events and exploratory memory encoding through the appearance of TGB activity (Buzsaki et al., 1992;  
515 Csicsvari & Dupret, 2014; Fisahn et al., 1998; Fuchsberger & Paulsen, 2022; Hasselmo, 1999; Herweg et  
516 al., 2020; Konopacki et al., 1987; Li et al., 2019; Ma et al., 2020; Nyhus & Curran, 2010; O'Keefe, 1993;  
517 Osipova et al., 2006; Sederberg et al., 2006; Sullivan et al., 2011; Wilson & McNaughton, 1994; S. Zhang et  
518 al., 2000; Y. Zhang et al., 2021). A key difference between recordings from *ex vivo* hippocampal murine  
519 slices and *ex vivo* whole-brains from zebrafish is that the former lack septo-hippocampal connections. The  
520 lack of cholinergic afferents impairs SW modulation and their silencing in these slices. In fact, to stimulate  
521 the transition from SW events to TGB activity the addition of exogenous cholinergic agonists to the bath  
522 solution is required (Ballinger et al., 2016; Fisahn et al., 1998; Fischer et al., 2014; Hasselmo, 1999).  
523 Though we do not yet fully understand the circuitry modulating SWs in zebrafish, many of the cholinergic  
524 nuclei are in the diencephalon, mesencephalon, and rhombencephalon (Clemente et al., 2004; Toledo-  
525 Ibarra et al., 2013). The presence of acetylcholinesterase (AChE)-positive neurons has also been shown in  
526 the telencephalon and the olfactory bulb, and the presence of choline acetyltransferase immunoreactivity  
527 (ChAT-ir) fibers in the caudal region of the telencephalon (Clemente et al., 2004). Additionally, it has



528 previously been shown that the transition from slow bursting sleep to propagating wave sleep in zebrafish,  
529 which respectively shares characteristics of slow wave sleep and REM sleep in mammals, is stimulated by  
530 cholinergic agents (Leung et al., 2019). This modulation is similar to that in mammals, in which acetylcholine  
531 tone is off during SW-rich slow wave sleep and on during REM sleep.

532 In our study, we observed silent events in *ex vivo* whole-brain preparations of juvenile zebrafish recordings,  
533 as defined by the absence of SW events in LFP recordings for at least 20 seconds in duration followed by  
534 the reappearance of these events with varied amplitude patterns (Figure 3). Single cell calcium imaging  
535 revealed that these silent events result from excitation that starts in region 4, housing putative cholinergic  
536 neurons (Clemente et al., 2004), and propagates through the entire telencephalon in a caudal-to-rostral  
537 fashion. Electrical stimulation of region 4 corroborates the suppression of SW events (Figure 5). Strikingly,  
538 previous literature showed that these events, or very similar events called propagating waves, are a  
539 signature of REM-like sleep in zebrafish (Leung et al., 2019), which suggests that the *ex vivo* preparation, in  
540 an 'offline' state, may have entrained sleep state-inducing mechanisms that are independent from external  
541 sensory cues. Furthermore, electrical stimulation of this region suppressed SW events for a period that was  
542 longer than endogenously generated silent periods. Post electrical stimulation events returned with  
543 increasing amplitude on all occasions, a pattern that was observed after endogenous silent periods (Figure  
544 3A – top trace).

545 To better understand whether silent periods are the result of extra-telencephalic afferents, we recorded SW  
546 events from de-tectomized preparations (Figure 6A). Given that SW events are modulated by the  
547 cholinergic system and that the zebrafish brain has most of its cholinergic nuclei outside of the  
548 telencephalon, we reasoned that the number of de-tectomized brains exhibiting SW events would decrease.  
549 Only 50% of de-tectomized brains exhibited at least one silent period, similar to whole-brains treated with  
550 atropine (Figure 6 B). MEC, a nicotinic receptor antagonist, however, did not change the number of  
551 recordings containing silent periods (Figure 6B) nor did it affect the number of SW events as compared to  
552 that in whole-brains in aCSF (Figure 7A). The lack of effect of MEC can be explained by differences in the  
553 contribution of nicotinic receptors to the generation and maintenance of SW events in the zebrafish and  
554 different routes of exposure (bath exposure like in this study or local exposure) and the kinetics of the  
555 receptor and its desensitization. In fact, drugs targeting nicotinic receptors, such as nicotine, have varied  
556 effects on the aforementioned parameters (Fischer et al., 2014). Nonetheless, this data implies a  
557 conservation in mechanisms for the modulation of SW events by the cholinergic system. Together, these  
558 findings support the possibility that *ex vivo* whole-brain preparations may exhibit two different types of silent  
559 period events – one which is cholinergic-dependent and is most likely coming from the tectum, and a  
560 second which may or may not be cholinergic-dependent and originates within the telencephalon.

561 In conclusion, the present study shows that SWRs are intrinsic to the telencephalon of zebrafish and that  
562 they are modulated by extra-telencephalic afferents. SWs from the right ADL are time-locked to events in  
563 the left ADL. The ADL exhibits silent periods with no detectable LFP activity that occur spontaneously  
564 following activation of region 4 (PMPa), which contains putative cholinergic neurons. Electrical stimulation of  
565 this area corroborated its involvement in silencing SW events. The BLA of zebrafish also exhibits SWR  
566 events that are coupled to SWs in the ADL, suggesting hippocampal to cortical/subcortical coupling that  
567 may contribute to memory consolidation. Finally, as in rodents, SW events in zebrafish are modulated by  
568 the cholinergic system. These data highlight zebrafish, in which whole-brain activity can be easily imaged,  
569 as an ideal model to study the coupling of SW events in diverse brain regions using both LFP and single cell  
570 calcium transients. Future studies are encouraged to examine SWRs and the modulation of their coupling  
571 between diverse brain regions in studies of learning and memory mechanisms, as well as zebrafish models  
572 of neurological and psychiatric disorders.

573 **REFERENCES:**

- 574 Ambrose, R. E., Pfeiffer, B. E., & Foster, D. J. (2016). Reverse Replay of Hippocampal Place Cells Is  
575 Uniquely Modulated by Changing Reward. *Neuron*, 91(5), 1124–1136.  
576 <https://doi.org/10.1016/j.neuron.2016.07.047>
- 577 Axmacher, N., Mormann, F., Fernández, G., Elger, C. E., & Fell, J. (2006). Memory formation by neuronal  
578 synchronization. *Brain Research Reviews*, 52(1), 170–182.  
579 <https://doi.org/10.1016/j.brainresrev.2006.01.007>
- 580 Ballinger, E. C., Ananth, M., Talmage, D. A., & Role, L. W. (2016). Basal Forebrain Cholinergic Circuits  
581 and Signaling in Cognition and Cognitive Decline. *Neuron*, 91(6), 1199–1218.  
582 <https://doi.org/10.1016/j.neuron.2016.09.006>
- 583 Bartoszek, E. M., Ostenrath, A. M., Jetti, S. K., Serneels, B., Mutlu, A. K., Chau, K. T. P., & Yaksi, E.  
584 (2021). Ongoing habenular activity is driven by forebrain networks and modulated by olfactory  
585 stimuli. *Current Biology*, 31(17), 3861–3874.e3. <https://doi.org/10.1016/j.cub.2021.08.021>
- 586 Behrens, C. J., van den Boom, L. P., de Hoz, L., Friedman, A., & Heinemann, U. (2005). Induction of sharp  
587 wave–ripple complexes in vitro and reorganization of hippocampal networks. *Nature Neuroscience*,  
588 8(11), 1560–1567. <https://doi.org/10.1038/nn1571>
- 589 Blanco, I., & Conant, K. (2020). Extracellular matrix remodeling with stress and depression: Studies in  
590 human, rodent and zebrafish models. *European Journal of Neuroscience*, ejn.14910.  
591 <https://doi.org/10.1111/ejn.14910>
- 592 Bocchio, M., Nabavi, S., & Capogna, M. (2017). Synaptic Plasticity, Engrams, and Network Oscillations in  
593 Amygdala Circuits for Storage and Retrieval of Emotional Memories. *Neuron*, 94(4), 731–743.  
594 <https://doi.org/10.1016/j.neuron.2017.03.022>
- 595 Brenet, A., Hassan-Abdi, R., Somkhit, J., Yanicostas, C., & Soussi-Yanicostas, N. (2019). Defective  
596 Excitatory/Inhibitory Synaptic Balance and Increased Neuron Apoptosis in a Zebrafish Model of  
597 Dravet Syndrome. *Cells*, 8(10), 1199. <https://doi.org/10.3390/cells8101199>
- 598 Buzsáki, G. (1986). Hippocampal sharp waves: Their origin and significance. *Brain Research*, 398(2), 242–  
599 252. [https://doi.org/10.1016/0006-8993\(86\)91483-6](https://doi.org/10.1016/0006-8993(86)91483-6)
- 600 Buzsáki, G. (1996). The Hippocampo-Neocortical Dialogue. *Cerebral Cortex*, 6(2), 81–92.  
601 <https://doi.org/10.1093/cercor/6.2.81>
- 602 Buzsáki, G. (2015). Hippocampal sharp wave-ripple: A cognitive biomarker for episodic memory and  
603 planning. *Hippocampus*, 25(10), 1073–1188. <https://doi.org/10.1002/hipo.22488>
- 604 Buzsáki, G., Horvath, Z., Urioste, R., Hetke, J., & Wise, K. (1992). High-frequency network oscillation in  
605 the hippocampus. *Science*, 256(5059), 1025–1027. <https://doi.org/10.1126/science.1589772>
- 606 Buzsáki, G., Lai-Wo S., L., & Vanderwolf, C. H. (1983). Cellular bases of hippocampal EEG in the  
607 behaving rat. *Brain Research Reviews*, 6(2), 139–171. [https://doi.org/10.1016/0165-0173\(83\)90037-1](https://doi.org/10.1016/0165-0173(83)90037-1)
- 608 Caccavano, A., Bozzelli, P. L., Forcelli, P. A., Pak, D. T. S., Wu, J.-Y., Conant, K., & Vicini, S. (2020).  
609 Inhibitory Parvalbumin Basket Cell Activity is Selectively Reduced during Hippocampal Sharp Wave  
610 Ripples in a Mouse Model of Familial Alzheimer’s Disease. *The Journal of Neuroscience*, 40(26),  
611 5116–5136. <https://doi.org/10.1523/JNEUROSCI.0425-20.2020>
- 612 Cheng, R.-K., Jesuthasan, S. J., & Penney, T. B. (2014). Zebrafish forebrain and temporal conditioning.  
613 *Philosophical Transactions of the Royal Society B: Biological Sciences*, 369(1637), 20120462.  
614 <https://doi.org/10.1098/rstb.2012.0462>
- 615 Clemente, D., Porteros, Á., Weruaga, E., Alonso, J. R., Arenzana, F. J., Aijón, J., & Arévalo, R. (2004).  
616 Cholinergic elements in the zebrafish central nervous system: Histochemical and  
617 immunohistochemical analysis: Zebrafish Cholinergic System. *Journal of Comparative Neurology*,  
618 474(1), 75–107. <https://doi.org/10.1002/cne.20111>
- 619 Colgin, L. L. (2016). Rhythms of the hippocampal network. *Nature Reviews Neuroscience*, 17(4), 239–249.  
620 <https://doi.org/10.1038/nrn.2016.21>

- 621 Cox, R., Rüber, T., Staeresina, B. P., & Fell, J. (2020). Sharp Wave-Ripples in Human Amygdala and Their  
622 Coordination with Hippocampus during NREM Sleep. *Cerebral Cortex Communications*, *1*(1),  
623 tga051. <https://doi.org/10.1093/texcom/tga051>
- 624 Csicsvari, J., & Dupret, D. (2014). Sharp wave/ripple network oscillations and learning-associated  
625 hippocampal maps. *Philosophical Transactions of the Royal Society B: Biological Sciences*,  
626 *369*(1635), 20120528. <https://doi.org/10.1098/rstb.2012.0528>
- 627 Ego-Stengel, V., & Wilson, M. A. (2009). Disruption of ripple-associated hippocampal activity during rest  
628 impairs spatial learning in the rat. *Hippocampus*, NA-NA. <https://doi.org/10.1002/hipo.20707>
- 629 Ellender, T. J., Nissen, W., Colgin, L. L., Mann, E. O., & Paulsen, O. (2010). Priming of Hippocampal  
630 Population Bursts by Individual Perisomatic-Targeting Interneurons. *Journal of Neuroscience*,  
631 *30*(17), 5979–5991. <https://doi.org/10.1523/JNEUROSCI.3962-09.2010>
- 632 Eller, J., Zarnadze, S., Bäuerle, P., Dugladze, T., & Gloveli, T. (2015). Cell Type-Specific Separation of  
633 Subicular Principal Neurons during Network Activities. *PLOS ONE*, *10*(4), e0123636.  
634 <https://doi.org/10.1371/journal.pone.0123636>
- 635 Eschenko, O., Ramadan, W., Molle, M., Born, J., & Sara, S. J. (2008). Sustained increase in hippocampal  
636 sharp-wave ripple activity during slow-wave sleep after learning. *Learning & Memory*, *15*(4), 222–  
637 228. <https://doi.org/10.1101/lm.726008>
- 638 Evangelista, R., Cano, G., Cooper, C., Schmitz, D., Maier, N., & Kempter, R. (2020). Generation of Sharp  
639 Wave-Ripple Events by Disinhibition. *The Journal of Neuroscience*, *40*(41), 7811–7836.  
640 <https://doi.org/10.1523/JNEUROSCI.2174-19.2020>
- 641 Fell, J., Klaver, P., Lehnertz, K., Grunwald, T., Schaller, C., Elger, C. E., & Fernández, G. (2001). Human  
642 memory formation is accompanied by rhinal–hippocampal coupling and decoupling. *Nature  
643 Neuroscience*, *4*(12), 1259–1264. <https://doi.org/10.1038/nn759>
- 644 Feng, P., Becker, B., Zheng, Y., & Feng, T. (2018). Sleep deprivation affects fear memory consolidation: Bi-  
645 stable amygdala connectivity with insula and ventromedial prefrontal cortex. *Social Cognitive and  
646 Affective Neuroscience*, *13*(2), 145–155. <https://doi.org/10.1093/scan/nsx148>
- 647 Fisahn, A., Pike, F. G., Buhl, E. H., & Paulsen, O. (1998). Cholinergic induction of network oscillations at  
648 40 Hz in the hippocampus in vitro. *Nature*, *394*(6689), 186–189. <https://doi.org/10.1038/28179>
- 649 Fischer, V., Both, M., Draguhn, A., & Egorov, A. V. (2014). Choline-mediated modulation of hippocampal  
650 sharp wave-ripple complexes in vitro. *Journal of Neurochemistry*, *129*(5), 792–805.  
651 <https://doi.org/10.1111/jnc.12693>
- 652 Fries, P. (2005). A mechanism for cognitive dynamics: Neuronal communication through neuronal  
653 coherence. *Trends in Cognitive Sciences*, *9*(10), 474–480. <https://doi.org/10.1016/j.tics.2005.08.011>
- 654 Fuchsberger, T., & Paulsen, O. (2022). Modulation of hippocampal plasticity in learning and memory.  
655 *Current Opinion in Neurobiology*, *75*, 102558. <https://doi.org/10.1016/j.conb.2022.102558>
- 656 Ganz, J., Kroehne, V., Freudenreich, D., Machate, A., Geffarth, M., Braasch, I., Kaslin, J., & Brand, M.  
657 (2015). Subdivisions of the adult zebrafish pallium based on molecular marker analysis.  
658 *F1000Research*, *3*, 308. <https://doi.org/10.12688/f1000research.5595.2>
- 659 Girardeau, G., Benchenane, K., Wiener, S. I., Buzsáki, G., & Zugaro, M. B. (2009). Selective suppression of  
660 hippocampal ripples impairs spatial memory. *Nature Neuroscience*, *12*(10), 1222–1223.  
661 <https://doi.org/10.1038/nn.2384>
- 662 Girardeau, G., Cei, A., & Zugaro, M. (2014). Learning-Induced Plasticity Regulates Hippocampal Sharp  
663 Wave-Ripple Drive. *Journal of Neuroscience*, *34*(15), 5176–5183.  
664 <https://doi.org/10.1523/JNEUROSCI.4288-13.2014>
- 665 Girardeau, G., Inema, I., & Buzsáki, G. (2017). Reactivations of emotional memory in the hippocampus–  
666 amygdala system during sleep. *Nature Neuroscience*, *20*(11), 1634–1642.  
667 <https://doi.org/10.1038/nn.4637>
- 668 Görlich, A., Antolin-Fontes, B., Ables, J. L., Frahm, S., Ślimak, M. A., Dougherty, J. D., & Ibañez-Tallon, I.  
669 (2013). Reexposure to nicotine during withdrawal increases the pacemaking activity of cholinergic  
670 habenular neurons. *Proceedings of the National Academy of Sciences*, *110*(42), 17077–17082.  
671 <https://doi.org/10.1073/pnas.1313103110>



- 672 Goutagny, R., Loureiro, M., Jackson, J., Chaumont, J., Williams, S., Isope, P., Kelche, C., Cassel, J.-C., &  
673 Lecourtier, L. (2013). Interactions between the Lateral Habenula and the Hippocampus: Implication  
674 for Spatial Memory Processes. *Neuropsychopharmacology*, 38(12), 2418–2426.  
675 <https://doi.org/10.1038/npp.2013.142>
- 676 Hajos, N., Karlocai, M. R., Nemeth, B., Ulbert, I., Monyer, H., Szabo, G., Erdelyi, F., Freund, T. F., &  
677 Gulyas, A. I. (2013). Input-Output Features of Anatomically Identified CA3 Neurons during  
678 Hippocampal Sharp Wave/Ripple Oscillation In Vitro. *Journal of Neuroscience*, 33(28), 11677–  
679 11691. <https://doi.org/10.1523/JNEUROSCI.5729-12.2013>
- 680 Hashimoto, A., Sawada, T., & Natsume, K. (2017). The change of picrotoxin-induced epileptiform  
681 discharges to the beta oscillation by carbachol in rat hippocampal slices. *Biophysics and*  
682 *Physicobiology*, 14(0), 137–146. [https://doi.org/10.2142/biophysico.14.0\\_137](https://doi.org/10.2142/biophysico.14.0_137)
- 683 Hasselmo, null. (1999). Neuromodulation: Acetylcholine and memory consolidation. *Trends in Cognitive*  
684 *Sciences*, 3(9), 351–359. [https://doi.org/10.1016/s1364-6613\(99\)01365-0](https://doi.org/10.1016/s1364-6613(99)01365-0)
- 685 Herweg, N. A., Solomon, E. A., & Kahana, M. J. (2020). Theta Oscillations in Human Memory. *Trends in*  
686 *Cognitive Sciences*, 24(3), 208–227. <https://doi.org/10.1016/j.tics.2019.12.006>
- 687 Ji, D., & Wilson, M. A. (2007). Coordinated memory replay in the visual cortex and hippocampus during  
688 sleep. *Nature Neuroscience*, 10(1), 100–107. <https://doi.org/10.1038/nn1825>
- 689 Jones, E. A., Gillespie, A. K., Yoon, S. Y., Frank, L. M., & Huang, Y. (2019). Early Hippocampal Sharp-  
690 Wave Ripple Deficits Predict Later Learning and Memory Impairments in an Alzheimer’s Disease  
691 Mouse Model. *Cell Reports*, 29(8), 2123–2133.e4. <https://doi.org/10.1016/j.celrep.2019.10.056>
- 692 Joo, H. R., & Frank, L. M. (2018). The hippocampal sharp wave–ripple in memory retrieval for immediate  
693 use and consolidation. *Nature Reviews Neuroscience*, 19(12), 744–757.  
694 <https://doi.org/10.1038/s41583-018-0077-1>
- 695 Judák, L., Chiovini, B., Juhász, G., Pálfi, D., Mezriczky, Z., Szadai, Z., Katona, G., Szmola, B., Ócsai, K.,  
696 Martinecz, B., Mihály, A., Dénes, Á., Kerekes, B., Szepesi, Á., Szalay, G., Ulbert, I., Mucsi, Z.,  
697 Roska, B., & Rózsa, B. (2022). Sharp-wave ripple doublets induce complex dendritic spikes in  
698 parvalbumin interneurons in vivo. *Nature Communications*, 13(1), 6715.  
699 <https://doi.org/10.1038/s41467-022-34520-1>
- 700 Kim, Y.-J., Nam, R.-H., Yoo, Y. M., & Lee, C.-J. (2004). Identification and functional evidence of  
701 GABAergic neurons in parts of the brain of adult zebrafish (*Danio rerio*). *Neuroscience Letters*,  
702 355(1–2), 29–32. <https://doi.org/10.1016/j.neulet.2003.10.024>
- 703 Konopacki, J., Bruce MacIver, M., Bland, B. H., & Roth, S. H. (1987). Carbachol-induced EEG ‘theta’  
704 activity in hippocampal brain slices. *Brain Research*, 405(1), 196–198. [https://doi.org/10.1016/0006-8993\(87\)91009-2](https://doi.org/10.1016/0006-8993(87)91009-2)
- 705
- 706 Lal, P., & Kawakami, K. (2022). Integrated Behavioral, Genetic and Brain Circuit Visualization Methods to  
707 Unravel Functional Anatomy of Zebrafish Amygdala. *Frontiers in Neuroanatomy*, 16, 837527.  
708 <https://doi.org/10.3389/fnana.2022.837527>
- 709 Landeck, L., Kaiser, M. E., Hefter, D., Draguhn, A., & Both, M. (2021). Enriched Environment Modulates  
710 Sharp Wave-Ripple (SPW-R) Activity in Hippocampal Slices. *Frontiers in Neural Circuits*, 15,  
711 758939. <https://doi.org/10.3389/fncir.2021.758939>
- 712 Lecourtier, L., DeFrancesco, A., & Moghaddam, B. (2008). Differential tonic influence of lateral habenula  
713 on prefrontal cortex and nucleus accumbens dopamine release. *European Journal of Neuroscience*,  
714 27(7), 1755–1762. <https://doi.org/10.1111/j.1460-9568.2008.06130.x>
- 715 Leung, L. C., Wang, G. X., Madelaine, R., Skariah, G., Kawakami, K., Deisseroth, K., Urban, A. E., &  
716 Mourrain, P. (2019). Neural signatures of sleep in zebrafish. *Nature*, 571(7764), 198–204.  
717 <https://doi.org/10.1038/s41586-019-1336-7>
- 718 Li, P., Geng, X., Jiang, H., Caccavano, A., Vicini, S., & Wu, J. (2019). Measuring Sharp Waves and  
719 Oscillatory Population Activity With the Genetically Encoded Calcium Indicator GCaMP6f.  
720 *Frontiers in Cellular Neuroscience*, 13, 274. <https://doi.org/10.3389/fncel.2019.00274>
- 721 Loren, F. (2009). Reward enhances reactivation of experience in the hippocampus. *Frontiers in Systems*  
722 *Neuroscience*, 3. <https://doi.org/10.3389/conf.neuro.06.2009.03.303>



- 723 Ma, X., Zhang, Y., Wang, L., Li, N., Barkai, E., Zhang, X., Lin, L., & Xu, J. (2020). The Firing of Theta  
724 State-Related Septal Cholinergic Neurons Disrupt Hippocampal Ripple Oscillations via Muscarinic  
725 Receptors. *The Journal of Neuroscience*, 40(18), 3591–3603.  
726 <https://doi.org/10.1523/JNEUROSCI.1568-19.2020>
- 727 Maier, N., Nimrich, V., & Draguhn, A. (2003). Cellular and Network Mechanisms Underlying  
728 Spontaneous Sharp Wave–Ripple Complexes in Mouse Hippocampal Slices. *The Journal of*  
729 *Physiology*, 550(3), 873–887. <https://doi.org/10.1113/jphysiol.2003.044602>
- 730 McGaugh, J. L. (2004). THE AMYGDALA MODULATES THE CONSOLIDATION OF MEMORIES OF  
731 EMOTIONALLY AROUSING EXPERIENCES. *Annual Review of Neuroscience*, 27(1), 1–28.  
732 <https://doi.org/10.1146/annurev.neuro.27.070203.144157>
- 733 Minatohara, K., Akiyoshi, M., & Okuno, H. (2016). Role of Immediate-Early Genes in Synaptic Plasticity  
734 and Neuronal Ensembles Underlying the Memory Trace. *Frontiers in Molecular Neuroscience*, 8.  
735 <https://doi.org/10.3389/fnmol.2015.00078>
- 736 Mölle, M., Yeshenko, O., Marshall, L., Sara, S. J., & Born, J. (2006). Hippocampal Sharp Wave-Ripples  
737 Linked to Slow Oscillations in Rat Slow-Wave Sleep. *Journal of Neurophysiology*, 96(1), 62–70.  
738 <https://doi.org/10.1152/jn.00014.2006>
- 739 Nicoll, R. A. (1985). The septo-hippocampal projection: A model cholinergic pathway. *Trends in*  
740 *Neurosciences*, 8, 533–536. [https://doi.org/10.1016/0166-2236\(85\)90190-0](https://doi.org/10.1016/0166-2236(85)90190-0)
- 741 Norman, Y., Yeagle, E. M., Khuvis, S., Harel, M., Mehta, A. D., & Malach, R. (2019). Hippocampal sharp-  
742 wave ripples linked to visual episodic recollection in humans. *Science*, 365(6454), eaax1030.  
743 <https://doi.org/10.1126/science.aax1030>
- 744 Northcutt, R. G. (2008). Forebrain evolution in bony fishes. *Brain Research Bulletin*, 75(2–4), 191–205.  
745 <https://doi.org/10.1016/j.brainresbull.2007.10.058>
- 746 Nyhus, E., & Curran, T. (2010). Functional role of gamma and theta oscillations in episodic memory.  
747 *Neuroscience & Biobehavioral Reviews*, 34(7), 1023–1035.  
748 <https://doi.org/10.1016/j.neubiorev.2009.12.014>
- 749 Ogawa, S., Kow, L. M., & Pfaff, D. W. (1991). Effects of GABA and related agents on the electrical activity  
750 of hypothalamic ventromedial nucleus neurons in vitro. *Experimental Brain Research*, 85(1).  
751 <https://doi.org/10.1007/BF00229989>
- 752 O’Keefe, J. (1993). Hippocampus, theta, and spatial memory. *Current Opinion in Neurobiology*, 3(6), 917–  
753 924. [https://doi.org/10.1016/0959-4388\(93\)90163-S](https://doi.org/10.1016/0959-4388(93)90163-S)
- 754 O’Neill, P.-K., Gore, F., & Salzman, C. D. (2018). Basolateral amygdala circuitry in positive and negative  
755 valence. *Current Opinion in Neurobiology*, 49, 175–183. <https://doi.org/10.1016/j.conb.2018.02.012>
- 756 Osipova, D., Takashima, A., Oostenveld, R., Fernandez, G., Maris, E., & Jensen, O. (2006). Theta and  
757 Gamma Oscillations Predict Encoding and Retrieval of Declarative Memory. *Journal of*  
758 *Neuroscience*, 26(28), 7523–7531. <https://doi.org/10.1523/JNEUROSCI.1948-06.2006>
- 759 Paré, D. (2002). Amygdala oscillations and the consolidation of emotional memories. *Trends in Cognitive*  
760 *Sciences*, 6(7), 306–314. [https://doi.org/10.1016/S1364-6613\(02\)01924-1](https://doi.org/10.1016/S1364-6613(02)01924-1)
- 761 Perumal, M. B., Latimer, B., Xu, L., Stratton, P., Nair, S., & Sah, P. (2021). Microcircuit mechanisms for the  
762 generation of sharp-wave ripples in the basolateral amygdala: A role for chandelier interneurons. *Cell*  
763 *Reports*, 35(6), 109106. <https://doi.org/10.1016/j.celrep.2021.109106>
- 764 Pignatelli, M., & Beyeler, A. (2019). Valence coding in amygdala circuits. *Current Opinion in Behavioral*  
765 *Sciences*, 26, 97–106. <https://doi.org/10.1016/j.cobeha.2018.10.010>
- 766 Ponomarenko, A. A., Korotkova, T. M., & Haas, H. L. (2003). High frequency (200 Hz) oscillations and  
767 firing patterns in the basolateral amygdala and dorsal endopiriform nucleus of the behaving rat.  
768 *Behavioural Brain Research*, 141(2), 123–129. [https://doi.org/10.1016/S0166-4328\(02\)00327-3](https://doi.org/10.1016/S0166-4328(02)00327-3)
- 769 Popescu, A. T., & Paré, D. (2011). Synaptic Interactions Underlying Synchronized Inhibition in the Basal  
770 Amygdala: Evidence for Existence of Two Types of Projection Cells. *Journal of Neurophysiology*,  
771 105(2), 687–696. <https://doi.org/10.1152/jn.00732.2010>

- 772 Porter, B. A., & Mueller, T. (2020). The Zebrafish Amygdaloid Complex – Functional Ground Plan,  
773 Molecular Delineation, and Everted Topology. *Frontiers in Neuroscience*, *14*, 608.  
774 <https://doi.org/10.3389/fnins.2020.00608>
- 775 Sadowski, J. H. L. P., Jones, M. W., & Mellor, J. R. (2016). Sharp-Wave Ripples Orchestrate the Induction  
776 of Synaptic Plasticity during Reactivation of Place Cell Firing Patterns in the Hippocampus. *Cell*  
777 *Reports*, *14*(8), 1916–1929. <https://doi.org/10.1016/j.celrep.2016.01.061>
- 778 Schlingloff, D., Kali, S., Freund, T. F., Hajos, N., & Gulyas, A. I. (2014). Mechanisms of Sharp Wave  
779 Initiation and Ripple Generation. *Journal of Neuroscience*, *34*(34), 11385–11398.  
780 <https://doi.org/10.1523/JNEUROSCI.0867-14.2014>
- 781 Sederberg, P. B., Schulze-Bonhage, A., Madsen, J. R., Bromfield, E. B., McCarthy, D. C., Brandt, A., Tully,  
782 M. S., & Kahana, M. J. (2006). Hippocampal and Neocortical Gamma Oscillations Predict Memory  
783 Formation in Humans. *Cerebral Cortex*, *17*(5), 1190–1196. <https://doi.org/10.1093/cercor/bhl030>
- 784 Sipilä, S. T., Schuchmann, S., Voipio, J., Yamada, J., & Kaila, K. (2006). The cation-chloride cotransporter  
785 NKCC1 promotes sharp waves in the neonatal rat hippocampus: NKCC1 promotes early sharp  
786 waves. *The Journal of Physiology*, *573*(3), 765–773. <https://doi.org/10.1113/jphysiol.2006.107086>
- 787 Skelin, I., Kilianski, S., & McNaughton, B. L. (2019). Hippocampal coupling with cortical and subcortical  
788 structures in the context of memory consolidation. *Neurobiology of Learning and Memory*, *160*, 21–  
789 31. <https://doi.org/10.1016/j.nlm.2018.04.004>
- 790 Skelin, I., Zhang, H., Zheng, J., Ma, S., Mander, B. A., Kim McManus, O., Vadera, S., Knight, R. T.,  
791 McNaughton, B. L., & Lin, J. J. (2021). Coupling between slow waves and sharp-wave ripples  
792 engages distributed neural activity during sleep in humans. *Proceedings of the National Academy of*  
793 *Sciences*, *118*(21), e2012075118. <https://doi.org/10.1073/pnas.2012075118>
- 794 Stork, O., & Pape, H.-C. (2002). Fear memory and the amygdala: Insights from a molecular perspective. *Cell*  
795 *and Tissue Research*, *310*(3), 271–277. <https://doi.org/10.1007/s00441-002-0656-2>
- 796 Sullivan, D., Csicsvari, J., Mizuseki, K., Montgomery, S., Diba, K., & Buzsáki, G. (2011). Relationships  
797 between Hippocampal Sharp Waves, Ripples, and Fast Gamma Oscillation: Influence of Dentate and  
798 Entorhinal Cortical Activity. *Journal of Neuroscience*, *31*(23), 8605–8616.  
799 <https://doi.org/10.1523/JNEUROSCI.0294-11.2011>
- 800 Sun, Z. Y., Bozzelli, P. L., Caccavano, A., Allen, M., Balmuth, J., Vicini, S., Wu, J.-Y., & Conant, K.  
801 (2018). Disruption of perineuronal nets increases the frequency of sharp wave ripple events.  
802 *Hippocampus*, *28*(1), 42–52. <https://doi.org/10.1002/hipo.22804>
- 803 Toledo-Ibarra, G. A., Rojas-Mayorquín, A. E., & Girón-Pérez, M. I. (2013). Influence of the Cholinergic  
804 System on the Immune Response of Teleost Fishes: Potential Model in Biomedical Research.  
805 *Clinical and Developmental Immunology*, *2013*, 1–9. <https://doi.org/10.1155/2013/536534>
- 806 Tukker, J. J., Beed, P., Schmitz, D., Larkum, M. E., & Sachdev, R. N. S. (2020). Up and Down States and  
807 Memory Consolidation Across Somatosensory, Entorhinal, and Hippocampal Cortices. *Frontiers in*  
808 *Systems Neuroscience*, *14*, 22. <https://doi.org/10.3389/fnsys.2020.00022>
- 809 Vandecasteele, M., Varga, V., Berényi, A., Papp, E., Barthó, P., Venance, L., Freund, T. F., & Buzsáki, G.  
810 (2014). Optogenetic activation of septal cholinergic neurons suppresses sharp wave ripples and  
811 enhances theta oscillations in the hippocampus. *Proceedings of the National Academy of Sciences*,  
812 *111*(37), 13535–13540. <https://doi.org/10.1073/pnas.1411233111>
- 813 Vargas, R., Jóhannesdóttir, I. þ., Sigurgeirsson, B., Þorsteinsson, H., & Karlsson, K. Æ. (2011). The  
814 zebrafish brain in research and teaching: A simple in vivo and in vitro model for the study of  
815 spontaneous neural activity. *Advances in Physiology Education*, *35*(2), 188–196.  
816 <https://doi.org/10.1152/advan.00099.2010>
- 817 Vargas, R., Þorsteinsson, H., & Karlsson, K. Æ. (2012). Spontaneous neural activity of the anterodorsal lobe  
818 and entopeduncular nucleus in adult zebrafish: A putative homologue of hippocampal sharp waves.  
819 *Behavioural Brain Research*, *229*(1), 10–20. <https://doi.org/10.1016/j.bbr.2011.12.025>
- 820 Vaz, A. P., Wittig, J. H., Inati, S. K., & Zaghoul, K. A. (2020). Replay of cortical spiking sequences during  
821 human memory retrieval. *Science*, *367*(6482), 1131–1134. <https://doi.org/10.1126/science.aba0672>

- 822 Vicente, A. F., Slézia, A., Ghestem, A., Bernard, C., & Quilichini, P. P. (2020). In Vivo Characterization of  
823 Neurophysiological Diversity in the Lateral Supramammillary Nucleus during Hippocampal Sharp-  
824 wave Ripples of Adult Rats. *Neuroscience*, *435*, 95–111.  
825 <https://doi.org/10.1016/j.neuroscience.2020.03.034>
- 826 Villalobos, C., Maldonado, P. E., & Valdés, J. L. (2017). Asynchronous ripple oscillations between left and  
827 right hippocampi during slow-wave sleep. *PLOS ONE*, *12*(2), e0171304.  
828 <https://doi.org/10.1371/journal.pone.0171304>
- 829 von Trotha, J. W., Vernier, P., & Bally-Cuif, L. (2014). Emotions and motivated behavior converge on an  
830 amygdala-like structure in the zebrafish. *European Journal of Neuroscience*, *40*(9), 3302–3315.  
831 <https://doi.org/10.1111/ejn.12692>
- 832 Wagatsuma, A., Okuyama, T., Sun, C., Smith, L. M., Abe, K., & Tonegawa, S. (2018). Locus coeruleus  
833 input to hippocampal CA3 drives single-trial learning of a novel context. *Proceedings of the National  
834 Academy of Sciences*, *115*(2). <https://doi.org/10.1073/pnas.1714082115>
- 835 Wilber, A. A., Skelin, I., Wu, W., & McNaughton, B. L. (2017). Laminar Organization of Encoding and  
836 Memory Reactivation in the Parietal Cortex. *Neuron*, *95*(6), 1406–1419.e5.  
837 <https://doi.org/10.1016/j.neuron.2017.08.033>
- 838 Wilson, M. A., & McNaughton, B. L. (1994). Reactivation of hippocampal ensemble memories during sleep.  
839 *Science (New York, N.Y.)*, *265*(5172), 676–679. <https://doi.org/10.1126/science.8036517>
- 840 Wu, C., Asl, M. N., Gillis, J., Skinner, F. K., & Zhang, L. (2005). An In Vitro Model of Hippocampal Sharp  
841 Waves: Regional Initiation and Intracellular Correlates. *Journal of Neurophysiology*, *94*(1), 741–753.  
842 <https://doi.org/10.1152/jn.00086.2005>
- 843 Ylinen, A., Bragin, A., Nadasdy, Z., Jando, G., Szabo, I., Sik, A., & Buzsáki, G. (1995). Sharp wave-  
844 associated high-frequency oscillation (200 Hz) in the intact hippocampus: Network and intracellular  
845 mechanisms. *The Journal of Neuroscience*, *15*(1), 30–46. <https://doi.org/10.1523/JNEUROSCI.15-01-00030.1995>
- 846
- 847 Zhang, S., José, J. V., & Tiesinga, P. H. E. (2000). Model of carbachol-induced gamma-frequency  
848 oscillations in hippocampus. *Neurocomputing*, *32–33*, 617–622. [https://doi.org/10.1016/S0925-2312\(00\)00223-X](https://doi.org/10.1016/S0925-2312(00)00223-X)
- 849
- 850 Zhang, Y., Cao, L., Varga, V., Jing, M., Karadas, M., Li, Y., & Buzsáki, G. (2021). Cholinergic suppression  
851 of hippocampal sharp-wave ripples impairs working memory. *Proceedings of the National Academy  
852 of Sciences of the United States of America*, *118*(15), e2016432118.  
853 <https://doi.org/10.1073/pnas.2016432118>
- 854 Zhou, H., Neville, K. R., Goldstein, N., Kabu, S., Kausar, N., Ye, R., Nguyen, T. T., Gelwan, N., Hyman, B.  
855 T., & Gomperts, S. N. (2019). Cholinergic modulation of hippocampal calcium activity across the  
856 sleep-wake cycle. *ELife*, *8*, e39777. <https://doi.org/10.7554/eLife.39777>
- 857
